# Supplementary material for: Psychosocial Aspects of Living Long Term with Advanced Cancer and Ongoing Systemic Treatment: A Scoping Review
Source: MDPI journal article supplement (doi:10.3390/cancers14163889), 2022-08-11
Supplement: s1 [file s1]

## Data-extraction tables

**Table S2.** Data-extraction table of quantitative studies.

| Author                                | Study design                                                                                    | Psychosocial outcomes                   | Recruitment                                                                                                                                                  | Patients                                                                                                                                                                | Sample size | Mean age (years)                | Female sex (%) | Time since diagnosis   | Baseline results (mean (SD))                                                                                                                                                                            | Terminology to refer to patient group                                                                                |
|---------------------------------------|-------------------------------------------------------------------------------------------------|-----------------------------------------|--------------------------------------------------------------------------------------------------------------------------------------------------------------|-------------------------------------------------------------------------------------------------------------------------------------------------------------------------|-------------|---------------------------------|----------------|------------------------|---------------------------------------------------------------------------------------------------------------------------------------------------------------------------------------------------------|----------------------------------------------------------------------------------------------------------------------|
| <b>Adamowicz, 2018, Poland</b>        | Prospective cohort study                                                                        | Health-related Quality of Life          | Consecutive sampling; recruitment from the Specialist Hospital and the Regional Center of Oncology in Poland                                                 | Colorectal cancer; first-line palliative chemotherapy                                                                                                                   | 330         | 66.0 (SD=11.7, range: 36-88)    | 57.9           | NR                     | <i>EORTC-QLQ-C30</i> Pre-treatment: QL: 65 (16.5) EF: 71 (15.6) Post-treatment: QL: 68 (15.4) EF: 72 (14.8)                                                                                             | Metastatic colorectal cancer patients; patients with advanced disease                                                |
| <b>Bannink, 2008, The Netherlands</b> | Longitudinal survey study                                                                       | Depression; anxiety                     | Part of the patients were recruited via the intervention arms of larger RCTs (EORTC 19881; EORTC 30012); recruitment of other patients not further specified | High-risk melanoma (n=8) or disseminated renal-cell carcinoma (n=35); interferon-alpha treatment                                                                        | 43          | Median age: 58.0 (range: 36-72) | 58.2           | NR                     | <i>MADRS</i><br><i>Total</i> 3.9 (3.8)<br><i>BAS Irritability</i> 0.4 (0.7)<br><i>HADS-A</i> 4.6 (3.0)<br><i>HADS-D</i> 2.6 (2.2)<br><i>BDI sum score</i> 5.6 (4.1)<br><i>SCL-90 Total</i> 112.6 (16.9) | Disseminated renal cell carcinoma                                                                                    |
| <b>Benedict, 2014, USA</b>            | Cross-sectional preliminary analysis of baseline data from a larger randomized controlled trial | Psychosocial wellbeing; Quality of Life | Patients were part of a larger RCT; recruitment via referrals from urology clinics, community presentations, and through the Florida Cancer Data System      | Prostate cancer; luteinizing hormone-releasing hormone agonists with concomitant external beam radiation therapy (EBRT)                                                 | 80          | 69.7 (SD=9.6)                   | 0.0            | 37.6 months (SD: 34.3) | <i>FACT-G</i><br><i>QL</i> : 82.7 (14.4)<br><i>CES-D</i> 9.3 (9.5)                                                                                                                                      | Patients with advanced prostate cancer undergoing androgen deprivation therapy                                       |
| <b>Bergerot, 2019, USA</b>            | Cross-sectional survey study                                                                    | Quality of Life; anxiety; depression    | Recruitment via one of three genitourinary medical oncologists at the institution                                                                            | Metastatic renal cell carcinoma (63%), urothelial cancer (28%) and prostate cancer (8%); immunotherapy (checkpoint inhibitors (CPIs)): nivolumab (35%) and atezolizumab | 60          | 65.0 (SD=13, rang: 31-91)       | 32.0           | NR                     | <i>FACT-G PROMIS-Depression</i><br><i>PROMIS-Anxiety</i><br>baseline scores NR                                                                                                                          | Patients with advanced genitourinary cancers initiating immunotherapy; patients with metastatic genitourinary cancer |

|                                       |                                                               |                                                                     |                                                                                                    |                                                                                                                                                                                        |    |                                 |      |                                                |                                                                                                                                                            |                                                                   |
|---------------------------------------|---------------------------------------------------------------|---------------------------------------------------------------------|----------------------------------------------------------------------------------------------------|----------------------------------------------------------------------------------------------------------------------------------------------------------------------------------------|----|---------------------------------|------|------------------------------------------------|------------------------------------------------------------------------------------------------------------------------------------------------------------|-------------------------------------------------------------------|
|                                       |                                                               |                                                                     |                                                                                                    | (30%), administered as first (33%) or second line of therapy (45%) for the majority of patients                                                                                        |    |                                 |      |                                                |                                                                                                                                                            |                                                                   |
| <b>Carmichael, 2013, USA</b>          | Cross-sectional survey study                                  | Health-related Quality of Life                                      | Purposive sampling; all patients diagnosed with RCC were identified using a institutional database | Metastatic renal cell carcinoma; targeted therapy (VEGF- or mTOR-directed therapy)                                                                                                     | 28 | 58.0 (rang: 40-72)              | 250  | NR                                             | <i>EORTC-QLQ-C30</i> QL 73.5 (21.0)<br>EF 82.4 (14.6)                                                                                                      | Long-term survivors (with metastatic renal cell carcinoma)        |
| <b>Cohen, 2001, USA</b>               | Secondary analysis of data from a phase Ib trial              | Treatment-specific optimism; depression; mood disturbance; distress | Patients were enrolled in a phase Ib trial of a heat shock protein peptide complex 96 trial        | Metastatic renal cell carcinoma (n=24), metastatic melanoma (n=22); nontoxic, active, specific immunotherapy comprised of an autologous tumor preparation without adjuvant therapy     | 46 | 54.9 (SD=8.9, range: 36-76)     | 30.0 | Mean TSD: 23.2 months (SD: 37.1, range: 1-168) | <i>CES-D</i> 12.67 (9.78)<br><i>POMS</i> TMD: 23.50 (33.71)<br><i>POMS</i> Depression 8.33 (10.36)<br><i>BSI</i> GSI 0.46 (0.40)<br>Depression 0.48 (0.68) | Patients with metastatic renal cell carcinoma/metastatic melanoma |
| <b>Cohen (de Moor), 2002, USA</b>     | Prospective observational study of data from a phase Ib trial | Quality of Life                                                     | Patients were enrolled in a phase Ib trial of a heat shock protein peptide complex 96 trial        | Stage IV metastatic renal cell carcinoma; heat-shock protein peptide complex 96 (HSPPC-96) autologous tumor vaccine treatment, a nontoxic, active, specific immunotherapy              | 29 | 56.5 (SD=8.4, range: 37-76)     | 22.0 | NR                                             | <i>SF-36</i> GH: 62 (22);<br>Role limitations: emotional: 76 (38) <i>IES</i> 21 (17)                                                                       | Patients with metastatic renal cell carcinoma                     |
| <b>Cohen (Parker), 2002, USA</b>      | Prospective observational study of data from a phase Ib trial | Quality of Life                                                     | Patients were enrolled in a phase Ib trial of a heat shock protein peptide complex 96 trial.       | Advanced melanoma stage III (n=10) or stage IV (n=20); heat-shock protein peptide complex 96 (HSPPC-96) autologous tumor vaccine treatment, a nontoxic, active, specific immunotherapy | 30 | 50.1 (SD=11.1 )                 | 37.0 | NR                                             | <i>SF-36</i> GH: 59 (21);<br>Role limitations: emotional: 91 (32) <i>IES</i> 23 (15)                                                                       | Patients with advanced melanoma                                   |
| <b>Custers, 2015, The Netherlands</b> | Cross-sectional survey study                                  | Fear of cancer recurrence; fear of progression                      | Recruitment from the database in Radboud University Medical Centre                                 | Gastrointestinal stromal tumors: localized (50%) or metastatic (50%); the tyrosine kinase inhibitor imatinib                                                                           | 54 | Median age: 63.0 (range: 21-83) | 46.0 | Mean TSD: 3.9 years (range: 0.5-17)            | <i>FCRI Severity</i> 16.8 (7.7)<br><i>CWS</i> 14.46 (5.2)<br><i>EORTC-QLQ-C30</i> QL 77.2 (19.8)<br>EF 78.4 (25.4)                                         | Patients with metastatic GIST                                     |

|                              |                              |                                                                                        |                                                                                                                                                             |                                                                                                                                                                                                                                                   |                                      |                                                                                                         |              |                                                                                       |                                                                                                                                                                                                                                                             |                                                                                      |
|------------------------------|------------------------------|----------------------------------------------------------------------------------------|-------------------------------------------------------------------------------------------------------------------------------------------------------------|---------------------------------------------------------------------------------------------------------------------------------------------------------------------------------------------------------------------------------------------------|--------------------------------------|---------------------------------------------------------------------------------------------------------|--------------|---------------------------------------------------------------------------------------|-------------------------------------------------------------------------------------------------------------------------------------------------------------------------------------------------------------------------------------------------------------|--------------------------------------------------------------------------------------|
|                              |                              |                                                                                        |                                                                                                                                                             |                                                                                                                                                                                                                                                   |                                      |                                                                                                         |              |                                                                                       | <i>HADS 9.3 (7.8)</i><br><i>IES 15.1 (16.7)</i>                                                                                                                                                                                                             |                                                                                      |
| <b>Daugherty, 2005, USA</b>  | Cross-sectional survey study | Spirituality; Quality of Life                                                          | Recruitment from the population of advanced cancer patients who had been accepted for phase I trials at a large urban, Midwestern medical center in the USA | Advanced cancer patients; experimental agents in clinical phase I trials (n=162) or standard care (n=156)                                                                                                                                         | 318                                  | 57.8 (SD=12.6 ) versus 57.9 (SD=12.3 ) for patients in phase I trials versus standard care respectively | 45 versus 58 | NR                                                                                    | <i>FACIT-SP 40.7 (7.2) versus 39.7 (7.2)</i><br><i>FACT-G QL 90.1 (13.6) versus 87.4 (14.5)</i><br><i>EW 15.6 (3.7) versus 16.2 (3.7) for patients in phase I trials versus standard care respectively</i>                                                  | Advanced cancer patients; terminally ill cancer patients;                            |
| <b>Denouel, 2018, France</b> | Longitudinal survey study    | Quality of Life                                                                        | Patients were enrolled in the COG-ANGIO study in 3 French institutions                                                                                      | Metastatic renal cell carcinoma; antiangiogenic therapies (vascular endothelial growth factor or mTOR inhibitors)                                                                                                                                 | 39                                   | Median age: 59.0 (28-78)                                                                                | 26.0         | NR                                                                                    | <i>FACT-G QL 81.2</i><br><i>EW 18.2 (3.5) (11.0)</i>                                                                                                                                                                                                        | Metastatic renal cell carcinoma patients                                             |
| <b>Devine, 2003, USA</b>     | Longitudinal survey study    | Quality of Life; psychological distress; social support; intrusive thoughts; avoidance | Patients were enrolled in a clinical trial receiving an experimental vaccine (Phase 1/b)                                                                    | Metastatic renal cell carcinoma (n=29) and metastatic melanoma (n=24); non-toxic, active, specific immunotherapy, consisting of an autologous tumor preparation                                                                                   | 53                                   | 53.4 years (range: 31-76)                                                                               | 26.0         | NR                                                                                    | <i>IES 19.8 (14.5)</i><br><i>BSI GSI 0.39 (0.32)</i>                                                                                                                                                                                                        | Patients with metastatic renal cell carcinoma; metastatic melanoma (Stage III or IV) |
| <b>Greer, 2019, USA</b>      | Randomized clinical trial    | Anxiety; depression; Quality of Life                                                   | Eligible patients were invited to participate in the study                                                                                                  | Gastrointestinal cancer (24.7%), gynaecological cancer (19.2%), lung cancer (20.5%), breast cancer (11.0%), melanoma (6.8%), sarcoma (9.6%), genitourinary (6.8%), thyroid (1.4%); CBT group: intravenous chemotherapy (82.2%), oral chemotherapy | 145 (72 CBT group, 73 control group) | 56.5 (SD=11.3 )                                                                                         | 73.8         | Median TSD: CBT group: 7.7 (range: 1.9- 23.3), control group: 7.5 (range: 2.0 - 24.3) | <i>HAM-A 19.4 (9.0) versus 19.1 (7.6)</i><br><i>HADS-A 11.2 (2.4) versus 11.6 (3.0)</i><br><i>HADS-D 6.8 (3.1) versus 7.0 (3.4)</i><br><i>PHQ-9 9.2 (5.1) versus 9.3 (5.1)</i><br><i>FACT-G 66.4 (12.3) versus 64.8 (16.3) for control versus CBT group</i> | Patients with incurable cancer                                                       |

|                                                        |                                   |                                                                     |                                                                                                                                                                                                    |                                                                                                                                                                                                                                                                                                        |                                     |                              |      |                                                                                           |                                                                                                                                                                                                                                                                                                                                                             |                                        |
|--------------------------------------------------------|-----------------------------------|---------------------------------------------------------------------|----------------------------------------------------------------------------------------------------------------------------------------------------------------------------------------------------|--------------------------------------------------------------------------------------------------------------------------------------------------------------------------------------------------------------------------------------------------------------------------------------------------------|-------------------------------------|------------------------------|------|-------------------------------------------------------------------------------------------|-------------------------------------------------------------------------------------------------------------------------------------------------------------------------------------------------------------------------------------------------------------------------------------------------------------------------------------------------------------|----------------------------------------|
|                                                        |                                   |                                                                     |                                                                                                                                                                                                    | (5.5%), immunotherapy (13.7%), radiation (6.8%), surgery (6.8%); control group: intravenous chemotherapy (80.6%), oral chemotherapy (4.2%), immunotherapy (11.1%), radiation (6.9%), surgery (9.7%)                                                                                                    |                                     |                              |      |                                                                                           |                                                                                                                                                                                                                                                                                                                                                             |                                        |
| <b>Greer, 2012, USA</b>                                | Pilot randomized controlled trial | Anxiety; Quality of Life                                            | Recruitment via oncology clinicians, palliative care specialists, psychiatrists, or patients themselves through advertisements in the Massachusetts General Hospital (MGH) Cancer Center in Boston | Metastatic lung cancer (30.0%), metastatic pancreatic cancer (17.5%), metastatic colorectal cancers (15.0%), others (37.5%); CBT group (n=20): chemotherapy (80%), radiation (5%), ambulatory palliative care (35%), control group (n=20): chemotherapy (100%), radiation (10%), palliative care (30%) | 40 (40 CBT group, 40 control group) | 55.9 (SD=10.9, range: 31-81) | 70.0 | Median TSD: CBT group: 6.6 months (range: 2.2-62.6), control group: 5.4 (range: 0.7-56.0) | <i>HAM-A</i> 24.5 (7.3) versus 24.4 (6.9)<br><i>MADRS</i> 23.4 (9.0) versus 22.4 (19.74)<br><i>HADS-A</i> 7.9 (4.5) versus 8.8 (4.6)<br><i>HADS-D</i> 7.7 (3.8) versus 9.1 (5.8)<br><i>IES</i> 32.3 (13.3) versus 36.1 (17.0)<br><i>FACT-G</i> 59.7 (14.4) versus 59.1 (16.9)<br><i>EW</i> 13.00 (5.1) versus 11.6 (5.5) for CBT group versus control group | Patients with terminal cancer          |
| <b>Guo, 2017, China</b>                                | Longitudinal survey study         | Depression                                                          | Recruitment via the Cancer Hospital of China Medical University, Liaoning Cancer Hospital & Institutes,                                                                                            | Metastatic breast cancer; chemotherapy                                                                                                                                                                                                                                                                 | 176                                 | Median age: 49.5 (28-80)     | 100  | NR                                                                                        | <i>Self-Rating Depression Scale (SDS)</i> major/medium depression risk 25.6%; minor depression symptoms 33.5%; not depressed 41.0%; no baseline SDS mean score for the total group reported                                                                                                                                                                 | Patients with metastatic breast cancer |
| <b>Gupta, 2014, USA, France, Germany, Italy, Spain</b> | Cross-sectional survey study      | Health-related Quality of Life; treatment satisfaction; family life | Convenience recruitment via panel recruiting, grassroots campaigns and newspaper advertising; patient support groups, physician referrals                                                          | Metastatic breast cancer; chemotherapy (n=191) or hormone therapy (n=169)                                                                                                                                                                                                                              | 360                                 | 58.3 (SD=6.32)               | 100  | Mean TSD: 4.5 years (SD: 5.0)                                                             | <i>FACT-G total</i> 56.4 (15.2)<br><i>EW</i> 12.0 (5.0)<br><i>FACT-B</i> 74.1 (19.2)                                                                                                                                                                                                                                                                        | Metastatic breast cancer patients      |

|                                  |                                                      |                                                                      |                                                                                                                                                                                                          |                                                                                                                                                                                                                                                                     |     |                                                                                                   |      |                                                                                                |                                                                                                                                                                                                                                 |                                                               |
|----------------------------------|------------------------------------------------------|----------------------------------------------------------------------|----------------------------------------------------------------------------------------------------------------------------------------------------------------------------------------------------------|---------------------------------------------------------------------------------------------------------------------------------------------------------------------------------------------------------------------------------------------------------------------|-----|---------------------------------------------------------------------------------------------------|------|------------------------------------------------------------------------------------------------|---------------------------------------------------------------------------------------------------------------------------------------------------------------------------------------------------------------------------------|---------------------------------------------------------------|
| <b>Khalaf, 2019, Canada</b>      | Randomized controlled phase II trial                 | Health-related Quality of Life; depression symptoms                  | Recruitment not further specified                                                                                                                                                                        | Metastatic castration-resistant prostate cancer; first-line treatment abiraterone and prednisone (n=101) or enzalutamide (n=101)                                                                                                                                    | 202 | Median age: abiraterone plus prednisone arm: 72.9 (67.4-79.1); enzalutamide arm: 77.6 (69.1-83.4) | 0.0  | NR                                                                                             | <i>FACT-P</i> 116 (105.7-130.1) versus 114 (100.0-128.0) <i>PHQ-9</i> 2 (1-5) versus 4 (1-7) for the abiraterone group versus enzalutamide group                                                                                | Patients with metastatic castration-resistant prostate cancer |
| <b>Kissane, 2004, Australia</b>  | Cross-sectional survey study                         | Quality of Life; depression; anxiety; coping                         | Recruitment from oncology services in seven general metropolitan hospitals and a range of private practitioners                                                                                          | Metastatic breast cancer; chemotherapy (plus further hormonal therapy, chemotherapy or radiotherapy)                                                                                                                                                                | 200 | 51.0 (SD=9)                                                                                       | 100  | 52 months (SD: 41)                                                                             | <i>EORTC-QLQ-C30</i><br><i>HADS</i><br>NR<br><i>MAC</i><br>NR<br><i>MCMQ</i><br>NR                                                                                                                                              | Patients with metastatic breast cancer                        |
| <b>Lacey, 2019, Australia</b>    | Pre-post-test feasibility cohort study (pilot study) | Quality of Life; depression; anxiety                                 | Recruitment via referral by treating oncologists or nurses from a single institution. Control group includes individuals who were eligible for the study but declined the supportive care intervention ( | Metastatic melanoma; immunotherapy (pembrolizumab) group (n=13) versus control group (n=15)                                                                                                                                                                         | 28  | Median age: 66.0 (42-85)                                                                          | 43.0 | Median TSD: 8 years (0.8-30.0); median TSD of metastatic disease: 2.8 years (range: 0.18-11.0) | <i>FACT-G</i> Total 89.5 (9.7) EW 20.2 (2.6) <i>ESAS</i> (intervention versus usual care group) depression 0.5 versus 0.4 anxiety 0.9 versus 0.5 <i>HADS-A</i> 3.0 (2.3) <i>HADS-D</i> 4.3 (3.4) <i>HADS-Distress</i> 7.3 (4.9) | Patients with metastatic melanoma                             |
| <b>Lai-Kwon, 2019, Australia</b> | Cross-sectional survey study                         | Quality of Life; anxiety; fear of recurrence or progression or death | Recruitment via weekly review of the Melanoma Service clinic lists                                                                                                                                       | Metastatic melanoma; immune checkpoint inhibitors (ICI) (n=69) or BRAF and MEK inhibitors (Bmi) (n=36); ICI (n=39): 57% were receiving ongoing treatment, 17 ceased due to toxicity, Bmi (n=31): 85% were receiving ongoing treatment, and 4 ceased due to toxicity | 105 | Median age: 62.0 (24-88)                                                                          | 43.0 | Mean TSD: ≤12 months (20%), 12-24 months (29%), >24 months (51%)                               | No outcomes of validated measures were reported                                                                                                                                                                                 | Long term responders; metastatic melanoma patients            |

|                                       |                              |                                |                                                               |                                                                                                                                                                                                                                                                |     |                                                                                      |      |                        |                                                                                                                                                             |                                                                                                                                                                                      |
|---------------------------------------|------------------------------|--------------------------------|---------------------------------------------------------------|----------------------------------------------------------------------------------------------------------------------------------------------------------------------------------------------------------------------------------------------------------------|-----|--------------------------------------------------------------------------------------|------|------------------------|-------------------------------------------------------------------------------------------------------------------------------------------------------------|--------------------------------------------------------------------------------------------------------------------------------------------------------------------------------------|
| <b>McFarland, 2019, USA</b>           | Cross-sectional survey study | Anxiety; depression; distress  | Recruitment via treating staff members, not further specified | Adenocarcinoma non-small cell lung cancer (71.8%), small cell lung cancer (16.5%), squamous cell carcinoma (6.4%), unspecified type of lung cancer (4.6%); chemotherapy (45.2%), immunotherapy (33.7%), targeted therapies (21.2%), and 5.5% missing treatment | 109 | 65.9                                                                                 | 62.4 | 15.4 months (SD: 17.3) | <i>HADS-A</i> 5.39 (3.94)<br><i>HADS-D</i> 4.9 (3.7)<br><i>DT&amp;PL</i> 3.91 (2.96)                                                                        | Patients with metastatic lung cancer undergoing treatment; patients with stage IV lung cancer who were receiving anticancer treatment                                                |
| <b>McFarland (Shaffer), 2019, USA</b> | Cross-sectional survey study | Anxiety; Depression            | Recruitment via treating staff members, not further specified | Adenocarcinoma non-small cell lung cancer (71.8%), small cell lung cancer (16.5%), squamous cell carcinoma (6.4%), unspecified type of lung cancer (4.6%); chemotherapy (45.2%), immunotherapy (33.7%), targeted therapies (21.2%), and 5.5% missing treatment | 109 | 65.9                                                                                 | 62.4 | 15.4 months (SD: 17.3) | <i>HADS-A</i> 5.39 (3.94)<br><i>HADS-D</i> 4.9 (3.7)                                                                                                        | Metastatic lung cancer patients receiving immunotherapy, targeted therapies, or anti-cancer treatments                                                                               |
| <b>Mir, 2018, France</b>              | Case-control study           | Depression; mood changes       | Consecutive sampling;                                         | Metastatic breast cancer; everolimus and hormone therapy (n=20), or hormone therapy (n=20)                                                                                                                                                                     | 40  | Everolimus plus hormone therapy: 62.2 (51.1-74.6), hormone therapy: 62.9 (51.6-72.0) | 100  | NR                     | <i>BDI</i> 7.15 (5.48) versus 7.15 (4.36) <i>MADRS</i> 14.0 (4.09) versus 14.6 (3.6) for hormone therapy group versus everolimus plus hormone therapy group | Post-menopausal patients with metastatic, estrogen receptor positive breast cancer resistant or refractory to aromatase inhibitors; patients with metastatic breast cancer treatment |
| <b>Miyake, 2014, Japan</b>            | Case-control study           | Health-related Quality of Life | Recruitment not further specified                             | Metastatic renal cell carcinoma; tyrosine kinase inhibitors                                                                                                                                                                                                    | 240 | Median age: 62.5 (37-86)                                                             | 22.0 | NR                     | <i>SF-36</i> overall score not reported                                                                                                                     | Metastatic renal cell carcinoma patients treated with TKIs; patients with                                                                                                            |

|                                      |                                              |                                  |                                                                                                                                                   |                                                                                                                                                                                                                                                |     |                                             |      |    |                                                                                               |                                                                                                                           |
|--------------------------------------|----------------------------------------------|----------------------------------|---------------------------------------------------------------------------------------------------------------------------------------------------|------------------------------------------------------------------------------------------------------------------------------------------------------------------------------------------------------------------------------------------------|-----|---------------------------------------------|------|----|-----------------------------------------------------------------------------------------------|---------------------------------------------------------------------------------------------------------------------------|
|                                      |                                              |                                  |                                                                                                                                                   | (sorafenib, sunitinib, axitinib)                                                                                                                                                                                                               |     |                                             |      |    |                                                                                               | metastatic cancer; patients with metastatic diseases who are incurable and have a limited life expectancy                 |
| <b>Moscetti, 2017, Italy</b>         | Multi-center prospective observational study | Health-related Quality of Life   | Recruitment via four Italian cancer centers                                                                                                       | Metastatic breast cancer; eribulin mesylate                                                                                                                                                                                                    | 50  | 64.0 (31-85)                                | 100  | NR | ESAS 32.6 (19.4)<br>FACT-G 56.7 (12.9)<br>FACT-B 78.1 (16.5)                                  | Patients with advanced breast cancer                                                                                      |
| <b>Mu, 2004, China</b>               | Prospective pre-post cohort study            | Quality of Life                  | Recruitment via Peking union medical college hospital                                                                                             | Squamous-cell carcinoma (32.3%), adenocarcinoma (64.5%); gefitinib (EGFR-TKI); at least one platinum-based regimen and most had received more than two regimens (different combinations including platinum, taxane, docetaxel and gemcitabine) | 31  | Median age: 64.0 (28-85)                    | 42.0 | NR | EORTC QLQ-C30 QL 36.0 (24.7) EF 67.67 (28.39)                                                 | Patients with advanced or metastatic non-small-cell lung cancer                                                           |
| <b>Mulder, 2014, The Netherlands</b> | Cross-sectional survey study                 | Mood; psychological wellbeing    | Recruitment of patients via treating specialists; recruitment of controls via acquaintances of the patients and by advertisements in local papers | Metastatic renal cell carcinoma (mRCC) or gastrointestinal stromal tumors (GIST); VEGFR sunitib or sorafenib                                                                                                                                   | 30  | 60.0 (38-81)                                | 10.0 | NR | SCL-90-R Total 123.10 (24.13) Anxiety 13.07 (3.10) Depression 23.87 (6.31) BDI-II 9.87 (5.76) | Patients with metastatic renal cell carcinoma                                                                             |
| <b>O'Reilly, 2020, UK</b>            | Cross-sectional survey study                 | Health-related Quality of Life   | Recruitment via the melanoma clinic in the outpatients department at the Royal Marsden NHS foundation trust of all eligible patients              | Metastatic melanoma; immune checkpoint inhibitors: ipilimumab (19%), pembrolizumab (37%), nivolumab (21%), ipilimumab plus nivolumab (14%), blinded clinical trial (8%)                                                                        | 73  | Median age: 65.0 (22-86)                    | 36.0 | NR | SF-36 GH 65.3 RE 78.5                                                                         | Metastatic melanoma survivors; patients with a diagnosis of metastatic melanoma who achieved a durable response to an ICI |
| <b>Osoba, 2002, USA</b>              | Randomized controlled trial                  | (Health-related) Quality of Life | Secondary analysis of prospective longitudinal questionnaires as part of an RCT                                                                   | Metastatic breast cancer; chemotherapy with (n=208) or without trastuzumab (n=192)                                                                                                                                                             | 400 | 53.0 (25-76) versus 52 (25-72) for trastuzu | 100  | NR | EORTC-QLQ-QL 59 (26) versus 58 (25) EW 67 (23) versus 66 (26) for trastuzumab+chemoth         | Patients with metastatic breast cancer                                                                                    |

|                                  |                                            |                                                                              |                                                                                                                                                            |                                                                                                                                                                                                           |      |                                            |      |                                                                                                   |                                                                                                      |                                                                       |
|----------------------------------|--------------------------------------------|------------------------------------------------------------------------------|------------------------------------------------------------------------------------------------------------------------------------------------------------|-----------------------------------------------------------------------------------------------------------------------------------------------------------------------------------------------------------|------|--------------------------------------------|------|---------------------------------------------------------------------------------------------------|------------------------------------------------------------------------------------------------------|-----------------------------------------------------------------------|
|                                  |                                            |                                                                              |                                                                                                                                                            |                                                                                                                                                                                                           |      | mab+chemotherapy versus chemotherapy alone |      |                                                                                                   | erapy versus chemotherapy alone                                                                      |                                                                       |
| <b>Oswald, 2019, USA</b>         | Cross-sectional survey study               | Optimism                                                                     | Recruitment via the urology and medical oncology clinics at VUMC and from the ZERO website                                                                 | Metastatic prostate cancer; systemic treatment not further specified                                                                                                                                      | 100  | 68.3 (SD=8.7)                              | 0.0  | NR                                                                                                | <i>Lot-R</i> 19.6 (4.31)                                                                             | Patients with (incurable) metastatic prostate cancer                  |
| <b>Goebell, 2014, Germany</b>    | Cross-sectional survey study               | Health-related Quality of Life                                               | Recruitment via a multicentre, prospective, noninterventional clinical mRCC Registry. (i.e. the mRCC registry, NCT00610012)                                | Advanced or metastatic renal cell carcinoma (RCC); sunitinib (n=50), sorafenib (n=15), temsirolimus (n=16), bevacizumab in combination with interferon alpha (n=11), everolimus or interferon alpha (n=6) | 98   | Median age: 70.5                           | 27.4 | NR                                                                                                | <i>FACT-G</i> 73.5 (18.3)                                                                            | Patients with advanced or metastatic renal cell carcinoma             |
| <b>Parente, 2017, Australia</b>  | Results from a randomized controlled trial | Quality of Life; happiness; mental health; coping; relationships; self-worth | Recruitment from eighteen Australian sites enrolled in a worldwide early access program study                                                              | Metastatic prostate cancer; cabazitaxel after docetaxel-based treatment                                                                                                                                   | 104  | Median age: 70.0 (43-89)                   | 0.0  | Median TSD: 53.93 months (36.5-82.4); median time since mCRPC diagnosis: 19.97 months (11.2-34.2) | <i>Australian Quality of Life (AQoL-8D) questionnaire</i> 0.7 (0.2) psychological subscale 0.4 (0.2) | Patients with metastatic castration-resistant prostate cancer (mCRPC) |
| <b>Patasius, 2019, Lithuania</b> | Retrospective cohort study                 | Suicide                                                                      | Prostate cancer cases diagnosed stage III or IV were extracted from the Lithuanian population-based Cancer Registry database; ICD-10-codes were identified | Prostate cancer stage III (86.3%) or stage IV (13.7%); androgen deprivation therapy                                                                                                                       | 5156 | NR                                         | 0.0  | NR                                                                                                | 32 suicides were reported. No validated questionnaires were reported                                 | Patients with advanced prostate cancer                                |
| <b>Paterson, 2018, Scotland</b>  | Pilot randomized controlled trial          | Depression; anxiety; Health-related Quality of Life; self-efficacy           | Recruitment via four hospitals in Scotland                                                                                                                 | Metastatic prostate cancer; androgen deprivation therapy                                                                                                                                                  | 38   | 74.9 (SD=8.2, range: 60-86) in the         | 0.0  | 7-56 months                                                                                       | <i>Self-management Self-Efficacy Scale (SES)</i> 3.5 (0.8); <i>EORTC-QLQ-C30 QL</i> 73.5 (22.2) EF   | Patients with metastatic prostate cancer on hormonal treatment        |



|                                      |                                       |                                                                                                          |                                                                                                                                                                                    |                                                                                                                                                                                                                                                                                                                                                                                                   |     |                                                                            |      |    |                                                                                                                                             |                                                                                                                          |
|--------------------------------------|---------------------------------------|----------------------------------------------------------------------------------------------------------|------------------------------------------------------------------------------------------------------------------------------------------------------------------------------------|---------------------------------------------------------------------------------------------------------------------------------------------------------------------------------------------------------------------------------------------------------------------------------------------------------------------------------------------------------------------------------------------------|-----|----------------------------------------------------------------------------|------|----|---------------------------------------------------------------------------------------------------------------------------------------------|--------------------------------------------------------------------------------------------------------------------------|
|                                      |                                       |                                                                                                          |                                                                                                                                                                                    |                                                                                                                                                                                                                                                                                                                                                                                                   |     | intervention group; 77.5 years (SD: 6.2; 66-93) in the standard care group |      |    | 87.5 (15.6) <i>HADS-A</i> 2.9 (3.4) <i>HADS-D</i> 3.6 (3.6)                                                                                 |                                                                                                                          |
| <b>Peters, 2014, The Netherlands</b> | Cross-sectional survey study          | Coping; fear of disease progression; social support and interactions; depressive mood related to fatigue | Recruitment via the department of Medical Oncology of a university and a regional hospital in the south eastern part of the Netherlands via preselection by the treating physician | Advanced, incurable cancer: 30% breast cancer, 30 gastrointestinal cancer, 11% urogenital cancer, 9.5% gynecological cancer, 9.5% bone and soft tissue cancer, 10% other cancers; palliative (symptom reducing or life prolonging) therapy: 53% chemotherapy, 15% oral targeted therapy, 15% hormonal therapy, 14% chemotargeted therapy, 1% radiotherapy, 1% chemo-radiotherapy, 1% no treatment | 137 | 59.0 (30-79)                                                               | 61.0 | NR | <i>Subscale acceptance of the Illness Cognition Questionnaire</i> 17 (4.3) <i>HADS-A</i> 6 (4.3) <i>HADS-D</i> 4 (3.6)                      | Patients with advanced incurable disease; patients on active treatment for various incurable cancers                     |
| <b>Peters, 2016, The Netherlands</b> | Longitudinal prospective cohort study | Non-acceptance of having incurable cancer; anxiety; depressive mood; social support                      | Recruitment via the department of Medical Oncology of a university and a regional hospital in the south eastern part of the Netherlands via preselection by the treating physician | Advanced, incurable cancer: 30% breast cancer, 30 gastrointestinal cancer, 11% urogenital cancer, 9.5% gynecological cancer, 9.5% bone and soft tissue cancer, 10% other cancers; palliative (symptom reducing or life prolonging) therapy: 53%                                                                                                                                                   | 137 | 59.0 (30-79)                                                               | 61.0 | NR | <i>Subscale acceptance of the Illness Cognition Questionnaire</i> median score 17 <i>HADS-A</i> median score 5 <i>HADS-D</i> median score 4 | Patients with advanced cancer receiving palliative cancer treatment; patients with incurable cancer (while on treatment) |

|                                                               |                                                          |                                                                                              |                                                                                                              |                                                                                                                                                                                                                                                                                                                                                                                                                                       |     |                |      |                                                                  |                                                                    |                                                                                                                                                                                        |
|---------------------------------------------------------------|----------------------------------------------------------|----------------------------------------------------------------------------------------------|--------------------------------------------------------------------------------------------------------------|---------------------------------------------------------------------------------------------------------------------------------------------------------------------------------------------------------------------------------------------------------------------------------------------------------------------------------------------------------------------------------------------------------------------------------------|-----|----------------|------|------------------------------------------------------------------|--------------------------------------------------------------------|----------------------------------------------------------------------------------------------------------------------------------------------------------------------------------------|
|                                                               |                                                          |                                                                                              |                                                                                                              | chemotherapy, 15%<br>oral targeted<br>therapy, 15%<br>hormonal therapy,<br>14% chemotargeted<br>therapy, 1%<br>radiotherapy, 1%<br>chemo-radiotherapy,<br>1% no treatment                                                                                                                                                                                                                                                             |     |                |      |                                                                  |                                                                    |                                                                                                                                                                                        |
| <b>Rouanne, 2013, France</b>                                  | Prospective cohort study                                 | Health-related Quality of Life; depression                                                   | Consecutive sampling; recruitment via phase I oncology trials at Institut Gustave Roussy (Villejuif, France) | Prostate cancer (n=3), testis cancer (n=1), renal cell carcinoma (n=1), endometrial and cervical (n=6), breast cancer (n=10), ovarian cancer (n=4), pancreas cancer (n=2), pleural mesothelioma (n=2), gastric cancer (n=3), colorectal cancer (n=9), non-small cell lung cancer (n=4), small cell lung cancer (n=5), head and neck cancer (n=6), sarcoma (n=1), melanoma (n=6); targeted anticancer drugs in phase I clinical trials | 63  | 54.7           | 39.7 | Mean TSD: 41 months                                              | <i>SF12; BDI</i>                                                   | Advanced or metastatic cancer patients referred to Phase I oncology trials; patients with advanced or metastatic disease included in Phase I oncology trials; advanced cancer patients |
| <b>Schuurhuizen (Braamse, Konings), 2019, The Netherlands</b> | Secondary analysis data from a randomized clinical trial | Health-related Quality of Life; depression; anxiety; psychological distress; Quality of Life | Analyses are based on 349 outpatients, recruited for a RCT throughout 16 hospitals in the Netherlands        | Metastatic colorectal cancer; starting with first-line systemic palliative chemotherapy                                                                                                                                                                                                                                                                                                                                               | 349 | 66.1 (SD=10.2) | 35.8 | Age at diagnosis: 23-83                                          | <i>HADS; DT&amp;PL; EORTC-QLQ-C30</i>                              | Patients with metastatic colorectal cancer (receiving first line systemic treatment)                                                                                                   |
| <b>Schuurhuizen (Braamse, Beekman), 2019, The Netherlands</b> | Multicentre, clustered randomized trial                  | Quality of Life; depression; anxiety                                                         | Recruitment via the medical oncology departments of 16 participating hospitals in the Netherlands            | Metastatic colorectal cancer; starting with first-line systemic palliative chemotherapy                                                                                                                                                                                                                                                                                                                                               | 349 | 66.1 (SD=10.2) | 35.8 | TSD: < 1.5 months: 33.2%, 1.5-10 months: 32.9%, >10 months: 33.2 | <i>HADS 9.52 (6.6) EORTC-QLQ-C30 QL 63.0 (21.8) EF 77.1 (18.9)</i> | Patients with metastatic colorectal cancer                                                                                                                                             |
| <b>Selvi, 2020, Germany</b>                                   | Prospective cohort study                                 | Health-related Quality of Life; post-traumatic                                               | Recruitment not further specified                                                                            | Metastatic prostate cancer; luteinizing hormone-releasing                                                                                                                                                                                                                                                                                                                                                                             | 60  | 69.83 (SD=5.3) | 0.0  | NR                                                               | <i>Post-traumatic stress disorder-civilian version</i>             | Patients with metastatic prostate cancer                                                                                                                                               |

|                                        |                                                                     |                                                                     |                                                                                                                                                                               |                                                                                                                                                                                             |     |                                                                         |      |    |                                                                                                                                                                                                    |                                                                                                                                      |
|----------------------------------------|---------------------------------------------------------------------|---------------------------------------------------------------------|-------------------------------------------------------------------------------------------------------------------------------------------------------------------------------|---------------------------------------------------------------------------------------------------------------------------------------------------------------------------------------------|-----|-------------------------------------------------------------------------|------|----|----------------------------------------------------------------------------------------------------------------------------------------------------------------------------------------------------|--------------------------------------------------------------------------------------------------------------------------------------|
|                                        |                                                                     | stress disorder (PTSD)                                              |                                                                                                                                                                               | hormone (LHRH) analogue treatment (n=60)                                                                                                                                                    |     |                                                                         |      |    | (PTSD-CV); SF-36 Baseline results NR                                                                                                                                                               |                                                                                                                                      |
| <b>Sherliker, 2000, UK</b>             | Feasibility study/mixed-methods                                     | Coping; psychological well-being; mental adjustments; mood symptoms | Recruitment via phase I clinical trials at the ICRF Medical Oncology Unit in Oxford, UK                                                                                       | Advanced metastatic cancer including lung cancer, breast cancer, colon cancer and kidney cancer; combination of fluorouracil, folinic acid and interferon (n=8) or experimental drugs (n=2) | 10  | 45-71                                                                   | 60.0 | NR | MAC Anxious preoccupation 23.3 (4.0) Fatalism 19.3 (3.3) Fighting spirit 50.4 (6.2) Helpless/hopeless 9.9 (3.1) HADS-A 5.1 (1.5) HADS-D 2.9 (2.2) POMS Baseline results NR                         | Patients with advanced cancer; patients with metastatic cancer; patients with advanced metastatic cancer                             |
| <b>Shin, 2016, USA</b>                 | Cross-sectional survey study                                        | Quality of Life; depression; anxiety                                | Consecutive recruitment via a trained research assistant at the ambulatory care clinic at the Massachusetts General Hospital Cancer Center through electronic medical records | Metastatic breast cancer; receiving endocrine therapy (n = 40) or chemotherapy (n=100)                                                                                                      | 140 | 66.0 (SD=11.3 ) for endocrine therapy, 58.6 (SD: 11.8) for chemotherapy | 100  | NR | FACT-B 111.6 (18.4) versus 104.9 (20.0) EW 17.9 (3.6) versus 17.0 (4.6) HADS-A 4.8 (3.4) versus 5.7 (4.1) HADS-D 3.0 (3.1) versus 4.5 (3.7) for endocrine therapy versus chemotherapy respectively | Patients with metastatic breast cancer                                                                                               |
| <b>Steffen McLouth, 2020, USA</b>      | Cross-sectional survey study                                        | Health-related Quality of Life                                      | Purposive sampling; recruitment via an academic medical center                                                                                                                | Metastatic non-small cell lung cancer (NSCLC); immunotherapy or chemoimmunotherapy                                                                                                          | 60  | 62.5 (SD=9.3)                                                           | 60.0 | NR | EORTC-QLQ-C30 QL 62.6 (21.5) EF 79.7 (20.1)                                                                                                                                                        | (Metastatic) non-small cell lung cancer patients receiving immunotherapy; metastatic lung cancer patients treated with immunotherapy |
| <b>Udupa, 2017, India</b>              | Longitudinal survey study                                           | Quality of Life                                                     | Recruitment via the Cancer Institute, Adyar, Chennai                                                                                                                          | Metastatic adenocarcinoma; tyrosine kinase inhibitors (n=20), or various platinum-based doublet chemotherapy (n=23)                                                                         | 43  | 58.4 versus 59.1 for TKI versus chemotherapy respectively               | 30.2 | NR | Cancer Institute-QOL Questionnaire (CI-QOL-Q) TKI: 128 (NR)                                                                                                                                        | Metastatic lung cancer patients; advanced lung cancer                                                                                |
| <b>Van Gool, 2008, The Netherlands</b> | Longitudinal survey study of a subset of patients of a larger study | Anxiety; depression                                                 | Consecutive sampling; recruitment of the second half of included patients in a larger study                                                                                   | Metastatic renal cell carcinoma; conventional short-acting IFN-alpha                                                                                                                        | 24  | Median age: 60.5 (47-72)                                                | 33.3 | NR | SCL-90 110.7 (15.5) Anxiety 12.3 (2.0) Depression 21.4 (4.4)                                                                                                                                       | Patients with metastatic renal cell cancer                                                                                           |
| <b>Wang, 2018, China</b>               | Prospective cohort study                                            | Quality of Life; depression; anxiety                                | Consecutive sampling via the Department of Urinary Surgery in                                                                                                                 | Metastatic renal cell carcinoma;                                                                                                                                                            | 127 | 54.9 (SD=11.2 )                                                         | 20.5 | NR | HADS-A 5.8 (3.2) HADS-D 6.4 (3.8)                                                                                                                                                                  | Patients with metastatic renal cell carcinoma                                                                                        |

|                                      |                                                       |                                         |                                                                                                                                                                          |                                                                                                                                                                                                                                   |     |                                                                                                |                                                                  |    |                                                                                                                                |                                                                       |
|--------------------------------------|-------------------------------------------------------|-----------------------------------------|--------------------------------------------------------------------------------------------------------------------------------------------------------------------------|-----------------------------------------------------------------------------------------------------------------------------------------------------------------------------------------------------------------------------------|-----|------------------------------------------------------------------------------------------------|------------------------------------------------------------------|----|--------------------------------------------------------------------------------------------------------------------------------|-----------------------------------------------------------------------|
|                                      |                                                       |                                         | Harbin Medical University Cancer Hospital                                                                                                                                | interferon-alpha (IFN- $\alpha$ ) treatment                                                                                                                                                                                       |     |                                                                                                |                                                                  |    | <i>EORTC-QLQ-C30 QL</i> 64.0 (14.3)                                                                                            |                                                                       |
| <b>Wood, 2017, USA, Europe</b>       | Cross-sectional survey study                          | Quality of Life; treatment satisfaction | Convenience sampling; Recruitment via participating physicians who recruited 8-10 patients from the United States, France, Germany, Italy, Spain, and the United Kingdom | HR+/HER2-advanced/metastatic breast cancer: stage IV: 83%, stage IIIB/C: 17%; chemotherapy only: 41.3%; endocrine therapy only: 39.6%; chemotherapy and/or endocrine combination therapies with or without targeted agents: 19.1% | 739 | 65.2 (SD=10.6)                                                                                 | 100                                                              | NR | <i>FACT-B</i> 85.9 (19.7) <i>EW</i> 13.1 (4.5) <i>FACT-G</i> 61.8 (15.8)                                                       | Patients with advanced or metastatic breast cancer                    |
| <b>Wyatt, 2012**, USA</b>            | Secondary analysis of data from a randomized clinical | Health-related Quality of Life          | Recruitment via 13 community-based medical oncology sites in the Midwest of the USA                                                                                      | Advanced breast cancer with distant metastases; chemotherapy and/or hormonal therapy                                                                                                                                              | 298 | 56.8 (11.2)                                                                                    | 100                                                              | NR | <i>SF-36</i> 53.6 (27.5) <i>State Anxiety Scale</i> 35.8 (11.9) <i>CES-D</i> 14.7 (10.3)                                       | Patients with advanced breast cancer                                  |
| <b>Yang, 2018, Taiwan</b>            | Longitudinal survey study                             | Quality of Life                         | Quasi-random sampling; recruitment via the outpatient departments of NCKUH                                                                                               | Recurrent or newly diagnosed EGFR-mutation-positive advanced non-small cell lung cancer (NSCLC); Gefitinib, erlotinib, afatinib                                                                                                   | 344 | 63.7 (SD=11.2), 61.9 (SD=12.8), 60.8 (SD=10.2) for gefitinib, erlotinib, afatinib respectively | 63.2, 55.6, 59.6 for gefitinib, erlotinib, afatinib respectively | NR | <i>EQ-5D</i> ; <i>WHOQOL-BREF</i> baseline means NR                                                                            | Patients with advanced non-small cell lung cancer                     |
| <b>Adamowicz, 2020, Poland</b>       | Prospective cohort study                              | Quality of Life                         | Recruitment via two centres in Poland                                                                                                                                    | Advanced metastatic breast cancer; palliative chemotherapy (40%), hormone therapy (34%), antiHER2-therapy (26%)                                                                                                                   | 351 | 62 (SD=9.8)                                                                                    | 100                                                              | NR | <i>EORTC-QLQ-C30 QL</i> 60.9 (23.7) <i>EF</i> 68.4 (25.7)                                                                      | Palliative patients; patients with advanced, metastatic breast cancer |
| <b>Bjelic-Radisic, 2020, Austria</b> | Randomized controlled trial (ABCSG-29 Posytive Trial) | Quality of Life                         | Recruitment via fifteen centres in Austria                                                                                                                               | Metastatic breast cancer; chemotherapy or endocrine                                                                                                                                                                               | 79  | Median age: 62.8                                                                               | 100                                                              | NR | <i>EORTC-QLQ-C30 QL</i> 47.8 (4.3) versus 61.6 (4.2) <i>EF</i> 58.1 (4.3) versus 62.3 (4.1) for primary surgery versus primary | Patients with primary metastatic breast cancer                        |

|                                                       |                                                                                                          |                                |                                                                                                                                                |                                                                                                                                                                                                       |      |                                                                             |                                                      |                                                                      |                                                                                                                     |                                                                         |
|-------------------------------------------------------|----------------------------------------------------------------------------------------------------------|--------------------------------|------------------------------------------------------------------------------------------------------------------------------------------------|-------------------------------------------------------------------------------------------------------------------------------------------------------------------------------------------------------|------|-----------------------------------------------------------------------------|------------------------------------------------------|----------------------------------------------------------------------|---------------------------------------------------------------------------------------------------------------------|-------------------------------------------------------------------------|
|                                                       |                                                                                                          |                                |                                                                                                                                                |                                                                                                                                                                                                       |      |                                                                             |                                                      |                                                                      | systemic therapy respectively                                                                                       |                                                                         |
| <b>Boevé, 2021, The Netherlands</b>                   | Randomized controlled trial (HORRAD)                                                                     | Health-related Quality of life | Recruitment via twenty-eight centres in the Netherlands                                                                                        | Primary bone metastatic prostate cancer; androgen deprivation therapy (ADT) and radiotherapy (RT) versus ADT alone                                                                                    | 432  | 67.0 (62-71) versus 66.5 (61-71) for ADT + RT versus ADT alone respectively | 0.0                                                  | NR                                                                   | EORTC-QLQ-C30 QL 70.2 (22.8) versus 70.0 (22.6) EF 74.4 (21.2) 73.6 (22.5) for ADT+RT versus ADT alone respectively | Patients with primary bone metastatic prostate cancer                   |
| <b>Cicin, 2020, Turkey</b>                            | Multicenter, non-interventional longitudinal study                                                       | Quality of Life                | Recruitment via twenty-eight centers in twelve regions of Turkey                                                                               | Metastatic renal cell carcinoma; axitinib (75.5%) or everolimus (24.5%)                                                                                                                               | 102  | Median age: 61.0 (SD=12, 24-83)                                             | 27.5                                                 | Median TSD: 27.5 months (4-201)                                      | EQ-5D-3L 0.49 (0.14-1) versus 0.48 (-0.74-1) for axitinib versus everolimus respectively                            | Advanced renal cell carcinoma patients; metastatic renal cell carcinoma |
| <b>Claessens, 2020, The Netherlands</b>               | Cross-sectional analysis of data from an ongoing real-world multi-center cohort study (SONABRE registry) | Quality of Life                | Recruitment from four hospitals participating in the SONABRE registry, by invitation by treating oncologists when visiting the outpatient ward | Advanced breast cancer (stage IV); receiving endocrine therapy (with or without targeted therapy) (51%), chemotherapy (with or without targeted therapy (37%), targeted therapy alone (5%), none (7%) | 92   | 65% <65, 35% ≥65                                                            | 100                                                  | NR                                                                   | EQ-5D-3L baseline mean NR                                                                                           | Advanced breast cancer patients                                         |
| <b>Davie, 2020, France, Germany, Italy, Spain, UK</b> | Multinational, real-world, point-in-time, patient record-based survey study                              | Health-related Quality of Life | Random recruitment via oncologists identified from publicly available lists of healthcare professionals                                        | Advanced breast cancer (stage IIIb (1%), stage IIIc (19%), stage IV (79%)); endocrine therapy with or without other systemic treatment(s)                                                             | 252  | 67.1 (SD=10.8)                                                              | 100                                                  | NR                                                                   | EORTC-QLQ-C30 QL 50.9 (24.7) EF (61.9 (26.2) EQ-5D-3L 0.69 (0.28)                                                   | Advanced disease; patients with advanced breast cancer                  |
| <b>Davies, 2020, UK</b>                               | Phase III, open-label, parallel-group study (GALLIUM-study)                                              | Health-related Quality of Life | Recruitment not further specified                                                                                                              | Advanced follicular lymphoma (grade 1-3a); obinutuzumab versus rituximab plus chemotherapy                                                                                                            | 1202 | Median age: 60 (26-88) versus 58 (23-85) for obinutuzumab versus rituximab  | 52.9% versus 53.4% for obinutuzumab versus rituximab | Median TSD: 1.5 months (0.1-121.6) versus 1.4 months (0.0-168.1) for | FACT-G EW 17.6 versus 17.9 for obinutuzumab versus rituximab plus chemotherapy respectively                         | Patients with advanced follicular lymphoma                              |

|                                            |                                                                                                    |                                                                                              |                                                                                  |                                                                                                          |     |                                                                                             |                       |                                                             |                                                                                                                                                                                           |                                                               |
|--------------------------------------------|----------------------------------------------------------------------------------------------------|----------------------------------------------------------------------------------------------|----------------------------------------------------------------------------------|----------------------------------------------------------------------------------------------------------|-----|---------------------------------------------------------------------------------------------|-----------------------|-------------------------------------------------------------|-------------------------------------------------------------------------------------------------------------------------------------------------------------------------------------------|---------------------------------------------------------------|
|                                            |                                                                                                    |                                                                                              |                                                                                  |                                                                                                          |     | versus<br>rituxima<br>b<br>respectiv<br>ely                                                 | b<br>respecti<br>vely | obinutuzu<br>mab<br>versus<br>rituximab<br>respectivel<br>y |                                                                                                                                                                                           |                                                               |
| <b>Fasching, 2020, Germany</b>             | Phase III, randomized, double-blind, placebo-controlled trial (MONALEES A-3)                       | Health-related Quality of Life (time to definitive 10% deterioration from baseline in HRQoL) | Recruitment via 174 study sites in 30 countries                                  | HR+/HER2- advanced breast cancer (98.8% stage IV); ribociclib and fulvestrant or placebo and fulvestrant | 726 | Median age: 63.0 (31-89) versus 63.0 (34-86)                                                | 100                   | NR                                                          | <i>EORTC-QLQ-C30</i> 65.5 (19.1) versus 68.4 (18.5)                                                                                                                                       | Patients with advanced breast cancer                          |
| <b>Fizazi, 2020, 13 European countries</b> | Secondary analysis of data from a phase IV, randomized, multicentre, open-label study (CARD study) | Quality of Life                                                                              | Recruitment from 62 clinical sites across 13 European countries                  | Metastatic prostate cancer; cabazitaxel (n=129) versus abiraterone or enzalutamide (n=126)               | 255 | Median age: 70 (65-76) versus 71 (64-75) for cabazitaxel versus abiraterone or enzalutamide | 0.0                   | NR                                                          | <i>FACT-G</i> 73.7 (16.5) versus 75.1 (16.6) <i>EW</i> 16.2 (4.5) versus 16.8 (4.7) <i>EQ-5D-5L VAS</i> 65.8 (20.4) versus 66.3 (18.5) for cabazitaxel versus abiraterone or enzalutamide | Patients with metastatic prostate cancer                      |
| <b>Harbeck, 2020, 30 countries</b>         | Phase III, randomized, double-blind, placebo-controlled trial (MONALEES A-7)                       | Health-related Quality of Life                                                               | Recruitment via 188 centres in 30 countries                                      | Advanced breast cancer; ribociclib (49.9%) or placebo (50.1%)                                            | 672 | 43.0 (25-58) versus 45.0 (29-58)                                                            | 100                   | NR                                                          | <i>EORTC-QLQ-C30 EQ-5D-5L baseline means</i> NR                                                                                                                                           | Patients with advanced breast cancer                          |
| <b>Hollen, 2020, USA</b>                   | Randomized controlled trial                                                                        | Treatment-related regret                                                                     | Recruitment via five hospitals in the USA                                        | Advanced non-small lung cancer; chemotherapy or a checkpoint inhibitor                                   | 160 | Age ≥70: 33% versus 27% for patients with regret versus without regret                      | 33% versus 46%        | NR                                                          | <i>Decision regret scale (DRS)</i> <i>Decisional conflict scale (DCS)</i> 15.6 (12.9-18.2); versus 17.9 (15.7-20.3)                                                                       | Patients with advanced lung cancer                            |
| <b>Joly, 2020, France</b>                  | Multicenter prospective observational cohort study (FUJI)                                          | Quality of Life                                                                              | Prospective sampling; recruitment via oncologists from various centers in France | Metastatic castration-resistant prostate cancer; cabazitaxel                                             | 60  | Median age: 72.0 (69-78)                                                                    | 0.0                   | NR                                                          | <i>FACT-P</i> 93.3 (18.3) <i>EW</i> 16.0 (4.8) <i>FACT-G</i> 66.7 (13.5)                                                                                                                  | Patients with metastatic castration-resistant prostate cancer |

|                                          |                                                                                            |                                                                     |                                                                                                      |                                                                                                                                                                                        |      |                                                                                                                                                   |                                                                                                                                     |    |                                                                                                                                                              |                                             |
|------------------------------------------|--------------------------------------------------------------------------------------------|---------------------------------------------------------------------|------------------------------------------------------------------------------------------------------|----------------------------------------------------------------------------------------------------------------------------------------------------------------------------------------|------|---------------------------------------------------------------------------------------------------------------------------------------------------|-------------------------------------------------------------------------------------------------------------------------------------|----|--------------------------------------------------------------------------------------------------------------------------------------------------------------|---------------------------------------------|
| <b>Joseph, 2020, USA</b>                 | Prospective observational study                                                            | Quality of Life                                                     | Consecutive sampling; recruitment via nine academic and satellite centers in the US                  | Advanced melanoma; pembrolizumab (PEMBRO) (n=225) or ipilimumab (IPI) plus nivolumab (NIVO) (n=187)                                                                                    | 412  | 63.8 (8.9) versus 61.5 (8.3) for PEMBR O versus IPI plus NIVO                                                                                     | 46.2 versus 39.6 for PEMBR O versus IPI plus NIVO                                                                                   | NR | <i>EORTC-QLQ-C30 QL</i> 58.8 (22.3) versus 59.5 (22.6) <i>EQ-5D-5L VAS</i> 65.0 (21.4) versus 67.7 (21.2) for PEMBRO versus IPI+NIVO                         | Patients with advanced melanoma             |
| <b>Lee, 2020, South Korea</b>            | Multicenter, prospective, open-label, randomized phase II trial                            | Quality of Life                                                     | Recruitment via fourteen academic institutions in South Korea                                        | Metastatic breast cancer; palbociclib plus endocrine treatment (n=92) versus capecitabine (n=86)                                                                                       | 178  | Median age: 44.0 (28-58)                                                                                                                          | 100                                                                                                                                 | NR | <i>EORTC-QLQ-C30 QL</i> 65.2 (20.8) versus 57.9 (22.3) <i>EF</i> 74.8 (18.7) versus 70.2 (21.6) for palbociclib plus endocrine treatment versus capecitabine | Metastatic breast cancer patients           |
| <b>Lu, 2021, Korea, Taiwan, Thailand</b> | International, multicenter, open-label, parallelgroup, phase Ib, dose, de-escalation study | Quality of Life; anxiety; depression                                | Recruitment via fifteen centers in Hong Kong, Republic of Korea, Taiwan, and Thailand                | Locally advanced or metastatic breast cancer (96.6%); tamoxifen and goserelin with either alpelisib or buparlisib                                                                      | 39   | 45.3                                                                                                                                              | 100                                                                                                                                 | NR | <i>EQ-5D-5L PHQ-9 General Anxiety Disorder-7 Scale (GAD-7)</i> for alpelisib versus buparlisib baseline means NR                                             | Patients with advanced breast cancer        |
| <b>Lynch, 2020, Australia</b>            | Feasibility study                                                                          | Fear of cancer recurrence                                           | Recruitment via the research staff at melanoma outpatient appointments at two hospitals in Australia | Metastatic melanoma; immunotherapies and/or targeted therapies                                                                                                                         | 61   | 61.4 (SD=11.6 )                                                                                                                                   | 33.0                                                                                                                                | NR | <i>FCRI-SF</i> 14.7 (7.77) <i>FoP-Q-SF</i> 25.4 (10.12)                                                                                                      | Survivors with advanced cancer/malignancies |
| <b>Marschner, 2020, Germany</b>          | Cohort study; data analysis of four prospective non-intervention, multicenter registries   | Health-related Quality of Life, associated with disease progression | Recruitment via 203 sites in Germany                                                                 | Metastatic breast cancer (20.1%), metastatic pancreatic cancer (34.9%), metastatic lung cancer (14.7%), metastatic colorectal cancer (30.3%); systemic palliative first-line treatment | 2314 | Median age: metastatic breast cancer: 61.6 (26.4-90.1), metastatic pancreatic cancer: 70.0 (39.0-93.0), metastatic lung cancer: 65.9 (28.4-88.2), | Metastatic breast cancer: 100, metastatic pancreatic cancer: 43.6, metastatic lung cancer: 34.6, metastatic colorectal cancer: 35.3 | NR | <i>FACT-G; EORTC-QLQ-C30; EORTC-QLQ-C15-PAL; HADS baseline means</i> NR                                                                                      | Patients with metastatic cancer             |

|                                    |                                                                                                        |                                |                                                                                       |                                                                                                                                                                                                                                  |     |                                                                                  |                                                                  |    |                                                                                                                                                                                                                                                                                  |                                                                                      |
|------------------------------------|--------------------------------------------------------------------------------------------------------|--------------------------------|---------------------------------------------------------------------------------------|----------------------------------------------------------------------------------------------------------------------------------------------------------------------------------------------------------------------------------|-----|----------------------------------------------------------------------------------|------------------------------------------------------------------|----|----------------------------------------------------------------------------------------------------------------------------------------------------------------------------------------------------------------------------------------------------------------------------------|--------------------------------------------------------------------------------------|
|                                    |                                                                                                        |                                |                                                                                       |                                                                                                                                                                                                                                  |     | metastatic colorectal cancer: 66.9 (26.9-92.1)                                   |                                                                  |    |                                                                                                                                                                                                                                                                                  |                                                                                      |
| <b>Marshall (Given), 2019, USA</b> | Secondary analysis of data from a randomized controlled trial                                          | Treatment beliefs              | Recruitment via six National Cancer Institute-designated comprehensive cancer centers | Advanced cancer; oral antineoplastic agents                                                                                                                                                                                      | 60  | 63.8 (SD=10.3)                                                                   | 62.0                                                             | NR | <i>Beliefs about Medicine Questionnaire-Specific (BMQ)</i>                                                                                                                                                                                                                       | Patients with (advanced) stage cancer                                                |
| <b>McFarland, 2020, USA</b>        | Cross-sectional survey study                                                                           | Anxiety; depression            | Recruitment not further specified                                                     | Stage IV lung cancer; chemotherapy (46.1%), immunotherapy (31.5%), targeted therapy (20.8%), missing (11.4%)                                                                                                                     | 96  | 66.1 (SD=9.2)                                                                    | 61.1                                                             | NR | <i>HADS-A</i> 5.4 (3.9) <i>HADS-D</i> 4.8 (3.5)                                                                                                                                                                                                                                  | Patients with metastatic lung cancers                                                |
| <b>Murray, 2020, USA</b>           | Pilot study                                                                                            | Quality of Life                | Recruitment not further specified                                                     | Advanced or metastatic prostate cancer; androgen deprivation therapy                                                                                                                                                             | 27  | 40-85                                                                            | 100                                                              | NR | <i>SF-12 (v2) QL</i> 44.2 RE 47.8 MH 53.0; <i>FACIT-P</i> EW 18.4                                                                                                                                                                                                                | Men with advanced and metastatic cancer                                              |
| <b>Ryoo, 2020, USA</b>             | Exploratory analysis of data from a randomized placebo-controlled and double-blind study (KEYNOTE-240) | Health-related Quality of Life | Secondary analysis of data via the KEYNOTE-240-study                                  | Advanced hepatocellular carcinoma; pembrolizumab (n=271) versus placebo (127)                                                                                                                                                    | 398 | NR                                                                               | NR                                                               | NR | <i>EORTC-QLQ-C30</i> 70.4 (20.1) versus 68.9 (21.5) for pembrolizumab versus placebo respectively                                                                                                                                                                                | Patients with advanced disease                                                       |
| <b>Slama, 2020, Czech Republic</b> | Single-center unblinded randomized controlled trial (PALINT)                                           | Quality of Life                | Recruitment via primary oncologists from a single institute                           | Advanced cancers: head and neck tumours (5.0% versus 0.0%), esophagus and stomach tumours (30.0% versus 24.2%), lung tumours (20.0% versus 21.2%), pancreas tumours (23.3% versus 34.8%), colon tumours (21.7% versus 19.7%) for | 126 | 61.1 (9.8) versus 63.5 (10.4) for intervention versus control group respectively | 38.3 versus 42.4 for intervention and control group respectively | NR | <i>EORTC-QLQ-C30 QL</i> 58.6 (53.9-63.3) versus 54.2 (49.4-58.9) EF 82.8 (77.9-87.7) versus 84.1 (79.8-88.4) <i>HADS</i> 10 (0-29) versus 9 (0-32) <i>HADS-A</i> 4 (0-15) versus 4 (0-15) <i>HADS-D</i> 6 (0-18) versus 5 (0-17) for intervention and control group respectively | Patients with (newly diagnosed) advanced cancer; patients with advanced solid tumors |



|                                                                                                                                                                                                                                          |                                                                                     |                                |                                                                                                                    |                                                                                                |      |                                                                               |      |                    |                                                                                                                                                                                |                                                            |
|------------------------------------------------------------------------------------------------------------------------------------------------------------------------------------------------------------------------------------------|-------------------------------------------------------------------------------------|--------------------------------|--------------------------------------------------------------------------------------------------------------------|------------------------------------------------------------------------------------------------|------|-------------------------------------------------------------------------------|------|--------------------|--------------------------------------------------------------------------------------------------------------------------------------------------------------------------------|------------------------------------------------------------|
|                                                                                                                                                                                                                                          |                                                                                     |                                |                                                                                                                    | intervention and control group respectively                                                    |      |                                                                               |      |                    |                                                                                                                                                                                |                                                            |
| <b>Stenzl, 2020, Argentina, Australia, Belgium, Canada, Chile, Denmark, Finland, France, Germany, Israel, Italy, Japan, New Zealand, Poland, Romania, Russia, Slovakia, South Korea, Spain, Sweden, Taiwan, the Netherlands, UK, USA</b> | Randomized, double blind, placebo-controlled, phase III study (ARCHES; NCT02677896) | Health-related Quality of Life | Recruitment via twenty-four countries, not further specified                                                       | Metastatic hormone-sensitive prostate cancer; enzalutamide (49.9%) or placebo plus ADT (50.1%) | 1150 | 70.0 (46-92) versus 70.0 (42-92) for enzalutamide versus placebo respectively | 0.0  | NR                 | <i>FACT-P</i> EW 18.4 (4.2) versus 18.2 (4.1) <i>FACT-G</i> 80.5 (14.8) versus 80.23 (14.0) <i>EQ-5D-5L</i> VAS 74.4 (17.1) versus 74.2 (16.9) for enzalutamide versus placebo | Patients with metastatic hormone-sensitive prostate cancer |
| <b>Taarnhoj, 2020, Denmark</b>                                                                                                                                                                                                           | Longitudinal survey study with data from two prospective clinical studies           | Quality of Life                | Recruitment not further specified                                                                                  | Advanced bladder cancer (67% metastatic disease); chemotherapy or immunotherapy                | 79   | 68 (35.1)                                                                     | 19.0 | NR                 | <i>EORTC-QLQ-C30</i> <i>QLQ-BLM30</i> <i>HADS</i>                                                                                                                              | Patients with advanced disease                             |
| <b>Thom, 2020, USA</b>                                                                                                                                                                                                                   | Cross-sectional survey and medical record review                                    | Quality of Life                | Recruitment via an institutional patient database                                                                  | Advanced melanoma; Immune checkpoint inhibitors                                                | 106  | 63.0 (SD=12.5)                                                                | 43.0 | NR                 | <i>EORTC-QLQ-C30</i> QL 84.0 (19.5) EF 84.6 (16.7)                                                                                                                             | Cancer survivors                                           |
| <b>Verrill, 2020, UK</b>                                                                                                                                                                                                                 | Cross-sectional survey study                                                        | Health-related Quality of Life | Mixed approach recruitment via physician referral from fourteen secondary and tertiary care centres across England | Metastatic breast cancer; treatment not further specified                                      | 102  | 55.3 (11.2)                                                                   | 100  | 30.0 months (37.0) | <i>EQ-5D-5L</i> VAS 65.8 (22.9) <i>FACT-G</i> ; <i>FACT-B</i> 92.2 (27.4) EW 15.2 (6.0) <i>FACT-G</i> 71.1 (22.4)                                                              | Patients with metastatic disease                           |
| <b>Westdorp, 2020, The Netherlands</b>                                                                                                                                                                                                   | Longitudinal survey study (part of a phase IIa trial)                               | Health-related Quality of Life | Recruitment via a RCT                                                                                              | Castration-resistant prostate cancer; dendritic cell vaccination therapy                       | 21   | 67 (53-82)                                                                    | 0.0  | NR                 | <i>EORTC-QLQ-C30</i> QL 75.4 (16.6) EF 75.8 (20.2) <i>BDI</i> 1.3 (1.8)                                                                                                        | Advanced prostate cancer patients                          |

|                              |                                                                                      |                                                     |                                                                                                                                                                                                                                                 |                                                                                                                                                                                                                                |     |                          |      |    |                                                                                                                                                                                                                                                               |                                                                                   |
|------------------------------|--------------------------------------------------------------------------------------|-----------------------------------------------------|-------------------------------------------------------------------------------------------------------------------------------------------------------------------------------------------------------------------------------------------------|--------------------------------------------------------------------------------------------------------------------------------------------------------------------------------------------------------------------------------|-----|--------------------------|------|----|---------------------------------------------------------------------------------------------------------------------------------------------------------------------------------------------------------------------------------------------------------------|-----------------------------------------------------------------------------------|
| <b>Long, 2016, Australia</b> | Phase III, randomized, double-blind study (CheckMate 066)                            | Health-related Quality of Life                      | Recruitment via eighty centers in Europe, Israel, Australia, Canada, and South America                                                                                                                                                          | Treatment-naïve advanced melanoma; nivolumab (50.2%) or dacarbazine (49.8%)                                                                                                                                                    | 418 | Median age: 65.0 (18-87) | 41.1 | NR | <i>EORTC-QLQ-C30</i> QL 68.9 (20.2) versus 66.2 (25.1) <i>EQ-5D VAS</i> 70.9 (19.9) versus 69.1 (21.8) for nivolumab versus dacarbazine respectively                                                                                                          | Patients with treatment-naïve advanced melanoma                                   |
| <b>El-Jawahri, 2014, USA</b> | Cross-sectional survey study                                                         | Quality of Life; mood symptoms                      | Consecutive sampling; recruitment via the patient database of the Massachusetts General Hospital Gastrointestinal Cancer Center by a trained research assistant with obtained permission from the treating oncologist                           | Incurable non-colorectal gastrointestinal cancer (78% hepatobiliary/pancreatic cancer, 22% gastroesophageal cancer); chemotherapy                                                                                              | 50  | 66.9 (SD=10.4)           | 28.0 | NR | <i>HADS-A</i> 3.5 (3.5) versus 5.4 (3.4) <i>HADS-D</i> 4.5 (3.7) versus 5.4 (2.9) <i>FACT-G</i> 80.9 (13.5) versus 73.1 (11.8) <i>EF</i> 18.2 (3.4) versus 15.0 (4.4) for curable prognostic perception versus not curable prognostic perception respectively | Patients with advanced cancer; patients with advanced, incurable cancers          |
| <b>Poort, 2019, USA</b>      | Secondary analysis of baseline data from a randomized controlled trial               | Anxiety; depression; Quality of Life                | Recruitment via the outpatient oncology clinics at Massachusetts General Hospital (MGH) Cancer Center in Boston, Massachusetts and two satellite clinics by study staff with permission from clinical oncologists to approach eligible patients | Hematologic malignancies (33%), non-small cell lung cancer (18%), breast cancer (14%), glioma (14%), sarcoma (8%), gastrointestinal (4%), melanoma (4%), genitourinary (4%), targeted therapy (66%) or oral chemotherapy (33%) | 180 | 53.3 (SD=12.9)           | 53.3 | NR | <i>HADS-A</i> 4.3 (3.3) versus 8.0 (4.1) <i>HADS-D</i> 3.1 (2.5) versus 7.3 (3.0) <i>FACT-G</i> 86.7 (12.8) versus 67.1 (11.7) <i>EW</i> 18.5 (4.0) versus 15.5 (4.8) for no-mild fatigue versus moderate-severe fatigue respectively                         | Patients with advanced cancer                                                     |
| <b>Greer, 2008, USA</b>      | Longitudinal survey study with data from a single-arm, prospective feasibility study | Quality of life; anxiety; depression                | Recruitment via a single-arm, prospective study from the Massachusetts General Hospital Palliative Care Team                                                                                                                                    | Advanced non-small cell lung cancer (stage IV 94%, stage IIIB 6%); chemotherapy                                                                                                                                                | 50  | 65.7 (SD=8.7)            | 60.0 | NR | <i>FACT-L</i> 94.4 (16.4) <i>HADS-A</i> <i>HADS-D</i> baseline means NR                                                                                                                                                                                       | Patients with advanced non-small-cell lung cancer; patients with incurable cancer |
| <b>Quist, 2015, Denmark</b>  | Prospective study with 1-group design                                                | Health-Related Quality of Life; anxiety; depression | Recruitment by referral from the Department of Oncology, Rigshospitalet, University of Copenhagen                                                                                                                                               | Advanced-stage lung cancer; chemotherapy                                                                                                                                                                                       | 114 | Median age: 66 (31-88)   | 50.0 | NR | <i>FACT-L</i> 94.4 (18.9) <i>EW</i> 15.2 (5.0) <i>HADS-A</i> 7.2 (4.4) <i>HADS-D</i> 5.3 (3.8)                                                                                                                                                                | Patients with advanced-stage lung cancer; patients with inoperable lung cancer    |
| <b>Jehn, 2012, Germany</b>   | Cross-sectional study                                                                | Anxiety; depression                                 | Recruitment not further specified                                                                                                                                                                                                               | Metastatic breast cancer; chemotherapy                                                                                                                                                                                         | 70  | 59.9 (SD=10.2)           | 100  | NR | <i>HADS</i>                                                                                                                                                                                                                                                   | Patients with metastatic breast cancer                                            |



Table S3. Data-extraction table of qualitative studies.

| Author                               | Objectives                                                                                                                                                                                                                      | Study design                                              | Recruitment                                                                                                                                                                                                                                     | Patients                                                                                                                                                                                                         | Sample size (n)                     | Mean age (years)                                                      | Female sex (%)                           | Time since diagnosis         | Data analysis                                           | Terminology to refer to patient group                                                                                                                                  |
|--------------------------------------|---------------------------------------------------------------------------------------------------------------------------------------------------------------------------------------------------------------------------------|-----------------------------------------------------------|-------------------------------------------------------------------------------------------------------------------------------------------------------------------------------------------------------------------------------------------------|------------------------------------------------------------------------------------------------------------------------------------------------------------------------------------------------------------------|-------------------------------------|-----------------------------------------------------------------------|------------------------------------------|------------------------------|---------------------------------------------------------|------------------------------------------------------------------------------------------------------------------------------------------------------------------------|
| <b>Brown, 2015*, The Netherlands</b> | To focus on ongoing, embodied and negotiated processes of sense-making and expectation-construction amidst uncertainty; explore hope, trust and their influence on the illness, medicines and trial experiences of participants | Interviews, field notes                                   | Purposeful recruitment; across phase II or III clinical trials, through a regional hospital and an urban academic hospital                                                                                                                      | Pancreatic cancer (53.8%), multiple myeloma (23.1%), renal cancer (15.4%), intestinal cancer (7.7%); clinical trial medication (not further specified)                                                           | 13                                  | 63.0                                                                  | 30.8                                     | NR                           | Interpretative phenomenological approach (IPA)          | Advanced-stage cancer diagnoses and limited prognoses                                                                                                                  |
| <b>Catt, 2019*, UK</b>               | To explore experiences of treatment decisions, information provision, perceived benefits and harms of treatment and the effects of these on patients' lives                                                                     | Interviews                                                | Consecutive sampling; across 20 hospitals in England, Scotland, Wales                                                                                                                                                                           | Metastatic castrate-resistant prostate cancer (mCRPC); abiraterone, enzalutamide, docetaxel, radium-223, cabazitaxel, steroid switch + abiraterone, goserelin, docetaxel + AZD5363, or enzalutamide + radium-223 | 37                                  | Partnered men (89.2%): 70.8 (56-89); single men (10.8%): 80.5 (71-91) | 0.0                                      | NR                           | Thematic analysis                                       | Advanced prostate cancer; progressive advanced prostate cancer; treatment has stopped working; the cancer has spread; aggressive prostate cancer; cancer is metastatic |
| <b>Grimsbo, 2011**, Norway</b>       | To explore the use and content of patients' e-mail messages sent to oncology nurses and thus gain a "snapshot" of patients' experiences of living with cancer as expressed through these messages                               | Analysis of 276 messages from patients to oncology nurses | Convenience sampling; recruitment via advertisements in the newspaper, on the Norwegian Cancer Society's Website, and its membership magazine, and through information pamphlets mailed to patients from the Norwegian National Cancer Registry | Breast cancer (63.3%) or prostate cancer (36.7%); currently receiving active treatment, not further specified                                                                                                    | 60 (16.7% patients with metastases) | Breast cancer: 52 (SD=7.9); prostate cancer: 65 (SD=7.6) (35-77)      | Breast cancer: 100; prostate cancer: 0.0 | n=25 >1 year; n=34 <= 1 year | Qualitative content analysis                            | Patients with metastases                                                                                                                                               |
| <b>Grunfeld, 2012, UK</b>            | To explore the experience and impact of andropause symptoms (particularly hot flashes) among men being treated with ADT                                                                                                         | Interviews                                                | Sampling from a clinic database at a large London teaching hospital                                                                                                                                                                             | Metastatic prostate cancer; receiving androgen deprivation therapy (ADT)                                                                                                                                         | 21                                  | 78.0 (68-92)                                                          | 0.0                                      | NR                           | Qualitative methodology based on the framework approach | Metastatic prostate cancer patients                                                                                                                                    |

|                                                        |                                                                                                                                                                                                                    |                                             |                                                                                                                                                                                                                                                                                                                                                              |                                                                                                                                                                                                     |    |                          |      |                                                       |                                                                          |                                                                                                                                                                  |
|--------------------------------------------------------|--------------------------------------------------------------------------------------------------------------------------------------------------------------------------------------------------------------------|---------------------------------------------|--------------------------------------------------------------------------------------------------------------------------------------------------------------------------------------------------------------------------------------------------------------------------------------------------------------------------------------------------------------|-----------------------------------------------------------------------------------------------------------------------------------------------------------------------------------------------------|----|--------------------------|------|-------------------------------------------------------|--------------------------------------------------------------------------|------------------------------------------------------------------------------------------------------------------------------------------------------------------|
|                                                        | for metastatic prostate cancer                                                                                                                                                                                     |                                             |                                                                                                                                                                                                                                                                                                                                                              |                                                                                                                                                                                                     |    |                          |      |                                                       |                                                                          |                                                                                                                                                                  |
| <b>Holmstrom, 2019*, USA</b>                           | To develop a conceptual model that describes patients' experiences of living with chemotherapy-naïve metastatic castration-resistant prostate cancer                                                               | Interviews                                  | Patients were identified from users of the Health Unlocked social network in USE. Physicians were identified via an external database                                                                                                                                                                                                                        | Chemotherapy-naïve metastatic castration-resistant prostate cancer; hormonal therapy (n=18); anti-androgens (n=13); abiraterone (n=6); bicalutamide (n=7); bisphosphonates (n=11)                   | 19 | Median age: 67.0 (51-78) | 0.0  | Median TSD of metastasis: 4.8 years (range: 1.0-13.0) | Grounded theory                                                          | Chemotherapy-naïve metastatic castration-resistant prostate cancer                                                                                               |
| <b>Hulin, 2017*, UK, France, Germany, Italy, Spain</b> | To expand the current knowledge on how relapse affects both patients and physicians                                                                                                                                | Interviews (including verbal rating scales) | Haematologists were asked to identify and nominate patients with RRMM who would be willing to participate, by using their own judgement                                                                                                                                                                                                                      | Relapsed or refractory multiple myeloma; targeted therapy: currently receiving lenalidomide (32%) or bortezomib (16%), previously receiving lenalidomide (44%), bortezomib (44%), thalidomide (44%) | 50 | Median age: 71.0 (51-85) | 44.0 | NR                                                    | Not specified                                                            | Patients with relapsed and/or refractory metastatic myeloma (RRMM)                                                                                               |
| <b>Kaufman, 2018, Germany, USA</b>                     | To provide a comprehensive overview of the impact of MCC and its management on patients' lives prior to diagnosis, at diagnosis, and after diagnosis, and to develop a disease model of adults with metastatic MCC | Interviews                                  | Patients participating in the single-arm, open-label, multicentre, international phase 2 JAVELIN Merkel 200 trial were invited to participate in optional qualitative interviews in all countries (Australia, Austria, Canada, France, Germany, Italy, Spain, Switzerland, and the USA), except Japan where interviews were viewed as culturally insensitive | Stage IV, chemotherapy-refractory, histologically confirmed merkel cell carcinoma; avelumab followed by surgery/radiotherapy                                                                        | 19 | 72.2 (SD=8.2)            | 21.0 | Mean TSD: 2.3 years (SD: 0.8)                         | Thematic analysis                                                        | Patients with advanced and metastatic MCC; late-stage (advanced or metastatic), non-resectable MCC                                                               |
| <b>Kvale, 2018, Norway</b>                             | To gain insight into the illness narratives of cancer patients, from the day they suspected that something was wrong up to the present day where they are living with incurable cancer,                            | Interviews                                  | Purposive, non-probability sampling via an outpatient clinic                                                                                                                                                                                                                                                                                                 | Metastasized cancers in the palliative phase: colon cancer (n=6), breast cancer (n=4), brain tumor (n=1), prostate cancer (n=1), peritoneum cancer(n=1); palliative,                                | 13 | 47-79                    | 53.8 | 0.5-5 years                                           | Thematic narrative analysis, supplied with some elements from structural | Living with life-prolonging chemotherapy; incurable cancer; patients living with life-prolonging chemotherapy; seriously ill cancer patients; non-curable cancer |

|                                                                              |                                                                                                                                                                                                                                                          |                                           |                                                                                                                                                                                                                                                                                                          |                                                                                                                                                                                  |    |                     |      |                    |                                                                                                                                                           |                                                                                                                                                                                                   |
|------------------------------------------------------------------------------|----------------------------------------------------------------------------------------------------------------------------------------------------------------------------------------------------------------------------------------------------------|-------------------------------------------|----------------------------------------------------------------------------------------------------------------------------------------------------------------------------------------------------------------------------------------------------------------------------------------------------------|----------------------------------------------------------------------------------------------------------------------------------------------------------------------------------|----|---------------------|------|--------------------|-----------------------------------------------------------------------------------------------------------------------------------------------------------|---------------------------------------------------------------------------------------------------------------------------------------------------------------------------------------------------|
|                                                                              | undergoing life prolonging chemotherapy                                                                                                                                                                                                                  |                                           |                                                                                                                                                                                                                                                                                                          | life-prolonging chemotherapy                                                                                                                                                     |    |                     |      |                    | narrative analysis                                                                                                                                        |                                                                                                                                                                                                   |
| <b>Levy, 2019, Australia</b>                                                 | To explore the lived experience of being on pembrolizumab treatment for advanced melanoma                                                                                                                                                                | Interviews                                | Purposive sampling; recruitment of patients was across two cohorts (details reported elsewhere)                                                                                                                                                                                                          | Metastatic melanoma; pembrolizumab                                                                                                                                               | 26 | 66.0 (41-84)        | 25.0 | NR                 | Thematic analysis using interpretative phenomenological analysis (IPA)                                                                                    | Metastatic melanoma patients; patients living with advanced melanoma                                                                                                                              |
| <b>Macdonald, 2012*, Canada, USA, Brazil, France, Germany, Russia, Spain</b> | To explore the experiences and emotions of patients through GIST diagnosis, treatment initiation, disease control, and in some patients, loss of response and therapy switch                                                                             | Interviews                                | Recruitment via individual clinical practice centres                                                                                                                                                                                                                                                     | Metastatic or unresectable gastrointestinal stromal tumors (GIST); Imatinib                                                                                                      | 50 | NR                  | NR   | NR                 | Ethnographic approach: multiple, in-context techniques, including individual and group interviews, life histories, and participant observation, were used | Patients with resected or metastatic/unresectable GIST                                                                                                                                            |
| <b>Milne, 2019*, Australia</b>                                               | To understand the experiences of patients with advanced melanoma who received immunotherapy and their carers; and to explore the impact of immunotherapy treatment (in particular side-effects) on patients' and carers' quality of life                 | Interviews                                | Purposive sampling from a specialist cancer centre in Melbourne, Australia                                                                                                                                                                                                                               | Stage IV melanoma; pembrolizumab (57%); nivolumab (13%); ipilimumab (9%); currently not receiving treatment (22%)                                                                | 23 | 59.0 (SD=15, 32-86) | 22.0 | NR                 | Interpretive description                                                                                                                                  | Patients with advanced melanoma; patients with stage IV melanoma; diagnosis of an incurable/chronic disease                                                                                       |
| <b>Mohammed, 2020*, Canada</b>                                               | To examine how people with late-stage cancer and their healthcare providers enacted the process of medicalisation through engaging in the search for oncological treatments, such as experimental drug trials, despite the incurability of their disease | Interviews, documents, field observations | Purposeful sampling; recruitment from an ambulatory palliative cancer clinic in a comprehensive cancer centre; and snowball sampling for participants with cancer to refer family members, informal caregivers and healthcare providers that they identified as important to their search for treatments | Advanced cancer: prostate cancer, bone marrow cancer, breast cancer, pancreas cancer; receiving a variety of allopathic therapies and informal therapies (not further specified) | 7  | Late 30s-early 70s  | 43.0 | 6 months - 5 years | Inductive coding, guided by a critical discourse analytical framework                                                                                     | Advanced cancer, incurable illness, people with late-stage cancer, terminal cancer, chronic illness that one could potentially survive, people with advanced, metastatic and life-limiting cancer |

|                              |                                                                                                                                                                                                                                                       |                                                                 |                                                                                                                                                                                                         |                                                                                                                                                                |    |                |      |                                                                                       |                                                 |                                                                                                                                                                                                                                                                    |
|------------------------------|-------------------------------------------------------------------------------------------------------------------------------------------------------------------------------------------------------------------------------------------------------|-----------------------------------------------------------------|---------------------------------------------------------------------------------------------------------------------------------------------------------------------------------------------------------|----------------------------------------------------------------------------------------------------------------------------------------------------------------|----|----------------|------|---------------------------------------------------------------------------------------|-------------------------------------------------|--------------------------------------------------------------------------------------------------------------------------------------------------------------------------------------------------------------------------------------------------------------------|
| <b>Mosher, 2013, USA</b>     | To identify concerns among distressed women with metastatic breast cancer with an emphasis on their experience of physical and emotional distress, social constraints, and existential issues                                                         | Analysis of 176 essays from home-based expressive writing trial | Recruitment via an invitational letter for an expressive writing intervention trial, after giving approval for contact via their oncologist                                                             | Stage IV breast cancer; hormonal therapy (77.3%), chemotherapy (97.7%)                                                                                         | 44 | 57.9 (SD=12.1) | 100  | Mean TSD: 4.1 (SD: 3.1)                                                               | Theoretical thematic analysis of essays         | Living with metastatic breast cancer; incurable illness; long-term survivor; advanced cancer patients                                                                                                                                                              |
| <b>Pujol, 2018, France</b>   | To investigate patient's thoughts and attitudes that determine the decision to undergo second-line chemotherapy                                                                                                                                       | Interviews                                                      | Purposive sampling; consecutive participants admitted to receive chemotherapy (second-line or third-line/palliative intent) for a lung cancer in the thoracic unit of the Montpellier academic hospital | Advanced non-small cell or small cell lung cancer; second-line or palliative chemotherapy                                                                      | 33 | 61.8 (SD=7.9)  | 33.0 | NR                                                                                    | Grounded theory                                 | Cancer patients in a palliative situation                                                                                                                                                                                                                          |
| <b>Finlayson, 2017, USA</b>  | To understand the lived experience of being aware of disease status among women with recurrent ovarian cancer                                                                                                                                         | Interviews                                                      | Purposive sampling; recruitment from the outpatient gynecological medical service of one large metropolitan cancer center via six different medical oncologists                                         | Recurrent ovarian cancer; currently receiving chemotherapy                                                                                                     | 12 | 58.0 (44-74)   | 100  | < 2 years: 8.3%; 2-3 years: 33.3%; 3-4 years: 16.7%; 4-5 years: 8.3%; 5+ years: 33.3% | A modified Colaizzi's seven-step method         | Advanced(-stage)ovarian cancer patients; women with recurrent ovarian cancer                                                                                                                                                                                       |
| <b>Thorne, 2013, Canada</b>  | To glean insights from the patient perspective as to what constitutes helpful and unhelpful clinical communication, and to determine how patients' needs and preferences in relation to such communication change over time within the cancer journey | Interviews                                                      | Purposive sampling; voluntary samples and recruited through multiple approaches                                                                                                                         | Chronic advanced metastatic cancer: breast cancer (n=8); hematological (n=5); gastrointestinal (n=2); receiving novel cancer therapies (not further specified) | 15 | 55.5 (32-72)   | NR   | NR                                                                                    | Interpretive description                        | Persons surviving for extended periods with advanced disease; incurable and life-limiting metastatic conditions; patients living longer with serious disease; chronic advanced cancer; chronic metastatic cancer; longstanding advanced metastatic cancer patients |
| <b>Wickersham, 2014, USA</b> | To explore the process of medication-taking for adults with non-small cell lung cancer receiving oral EGFR                                                                                                                                            | Interviews                                                      | Purposive sampling; recruitment at two outpatient lung cancer clinics at the National Cancer Institute                                                                                                  | Non-small cell lung cancer; EGFR-treatment erlotinib                                                                                                           | 13 | 70.5 (52-83)   | 61.5 | NR                                                                                    | Constant comparative analysis, grounded theory, | Surviving with lung cancer; surviving with metastatic cancer; life-limiting illness without cure; not survive after,                                                                                                                                               |

|                                 |                                                                                                                                                                                          |            |                                                                                                                                                                                          |                                                                                                                               |    |                          |      |                              |                                                                                                                                   |                                                          |
|---------------------------------|------------------------------------------------------------------------------------------------------------------------------------------------------------------------------------------|------------|------------------------------------------------------------------------------------------------------------------------------------------------------------------------------------------|-------------------------------------------------------------------------------------------------------------------------------|----|--------------------------|------|------------------------------|-----------------------------------------------------------------------------------------------------------------------------------|----------------------------------------------------------|
|                                 | therapy, to develop a grounded theory that described and explained the process of medication-taking in this patient population                                                           |            | designated cancer center                                                                                                                                                                 |                                                                                                                               |    |                          |      |                              | questioning the data, dimensional analysis, matrix construction, writing case titles and story summaries, and a literature review | but with lung cancer; chronic life-threatening condition |
| <b>Wong, 2019, Australia</b>    | To explore real-world experiences of patients with advanced melanoma currently receiving pembrolizumab, focussing on factors that influenced their treatment decision-making             | Interviews | Purposive sampling; recruitment of patients from a specialist cancer center in Melbourne, Australia                                                                                      | Stage IV melanoma; pembrolizumab; prior treatment ipilimumab (22%) or dabrafenib/trametinib (9%)                              | 23 | 68.0 (SD=12, 34-92)      | 13.0 | NR                           | Thematical analysis                                                                                                               | Stage IV melanoma; advanced melanoma                     |
| <b>Al Achkar, 2020, USA</b>     | To characterise the unmet needs of patients with advanced lung cancer on targeted therapy and to explore how their healthcare experiences with clinicians and care teams can be improved | Interviews | Recruitment via online closed oncogene-focused lung cancer groups of patients and their caregivers (Facebook, ROSOneder, EGFR Resisters)                                                 | Advanced or metastatic non-small cell lung cancer stage IV (95%) or stage IIIb (5%); targeted therapy (not further specified) | 39 | Median age: 48 (30-75)   | 71.8 | Median TSD: 21 months (3-81) | Critical theory-based analysis methods                                                                                            | Patients with advanced lung cancer on targeted therapies |
| <b>Gray, 2020, South Africa</b> | To report experiences of men in South Africa treated with ADT to share their perceived effects of the treatment                                                                          | Interviews | Recruitment via an urban oncology clinic in Pretoria, South Africa                                                                                                                       | Advanced prostate cancer; androgen deprivation therapy (ADT)                                                                  | 22 | 63-78                    | 0.0  | NR                           | NR                                                                                                                                | Prostate cancer patients                                 |
| <b>Poort, 2021, USA</b>         | To explore patients' experiences of PARPi-related fatigue and its impact on their lives                                                                                                  | Interviews | Purposive sampling; potentially eligible participants were identified using an EPIC workbench that identified patients with a PARPi listed in the electronic records' medication section | Advanced ovarian cancer stage I-II (22%), stage III (70%), stage IV (13%); receiving oral PARP inhibitors                     | 23 | 63.0 (50-86)             | 100  | Mean TSD: 3 years (0-11)     | Thematic analysis                                                                                                                 | Ovarian cancer patients on maintenance PARPi             |
| <b>Walsh, 2021, USA</b>         | To explore how lung cancers survivors engage in online support                                                                                                                           | Interviews | Purposive sampling; recruitment via oncogene-specific                                                                                                                                    | Advanced lung cancer stage IV (95%) or stage IIIb (5%); targeted                                                              | 40 | Median age: 49.0 (30-75) | 70.0 | Median TSD: 19.5             | Thematic analysis                                                                                                                 | Lung cancer survivors                                    |



|                                       |                                                                                                                                                                                           |                         |                                                                                                                            |                                                                                                                                                                                                                                                                                                                   |    |              |      |                                    |                                                                                                            |                                                                                           |
|---------------------------------------|-------------------------------------------------------------------------------------------------------------------------------------------------------------------------------------------|-------------------------|----------------------------------------------------------------------------------------------------------------------------|-------------------------------------------------------------------------------------------------------------------------------------------------------------------------------------------------------------------------------------------------------------------------------------------------------------------|----|--------------|------|------------------------------------|------------------------------------------------------------------------------------------------------------|-------------------------------------------------------------------------------------------|
|                                       | communities and what the psychological, social and physical impacts of such engagement are                                                                                                |                         | online lung cancer support groups: EGFR Resisters, ALK-Positive Facebook Group and the ROS1ders                            | therapies (not further specified)                                                                                                                                                                                                                                                                                 |    |              |      | months (3-152)                     |                                                                                                            |                                                                                           |
| <b>Buiting, 2013, The Netherlands</b> | To explore the extent to which patients have a directing role in decisions about chemotherapy in the palliative phase of cancer and (want to) anticipate on the last stage of life        | Interviews              | Purposive sampling; via a palliative care nurse who traced and invited potentially eligible patients                       | Colon cancer (66.6%) or breast cancer (33.3%); indication second line chemotherapy (n=1); second line chemotherapy (n=4); indication third line chemotherapy (n=1); indication third line immunotherapy (n=1); third line chemotherapy (n=2); (indication) third/fourth line chemo-immuno-/targeted therapy (n=2) | 15 | 65.0 (48-85) | 53.3 | NR                                 | Thematic content analysis                                                                                  | Patients with advanced colorectal and breast cancer                                       |
| <b>Karlsson, 2014, Sweden</b>         | To interpret meanings of existential uncertainty and certainty for people diagnosed with advanced gastrointestinal cancer and receiving palliative treatment                              | Interviews              | Recruitment via an oncological outpatient clinic that specialises in palliative care for gastrointestinal cancer           | Gastrointestinal cancer with various metastases; palliative treatments (not further specified)                                                                                                                                                                                                                    | 14 | 49-79        | 50.0 | 2 months - 20 years                | Naive reading, structural analysis and interpreted whole (in line with Ricoeur's theory of interpretation) | People diagnosed with advanced gastrointestinal cancer and receiving palliative treatment |
| <b>Svensson, 2009, Sweden</b>         | To explore psychological reactions and coping at disease progression after first-line chemotherapy among women with metastatic breast cancer participating in a randomized clinical trial | Interviews              | Women included in a randomized phase III study were asked to participate                                                   | Metastatic breast cancer; chemotherapy: epirubicin and paclitaxel with or without capecitabine                                                                                                                                                                                                                    | 20 | 56.3 (6.2)   | 100  | TSD to PD first line: 2 - 20 years | Content analysis                                                                                           | Women with metastatic breast cancer                                                       |
| <b>Brown, 2015*, The Netherlands</b>  | To focus on ongoing, embodied and negotiated processes of sense-making and expectation-construction amidst uncertainty; explore hope, trust and their influence on the                    | Interviews, field notes | Purposeful recruitment; across phase II or III clinical trials, through a regional hospital and an urban academic hospital | Pancreatic cancer (53.8%), multiple myeloma (23.1%), renal cancer (15.4%), intestinal cancer (7.7%); clinical trial medication (not further specified)                                                                                                                                                            | 13 | 63.0         | 30.8 | NR                                 | Interpretative phenomenological approach (IPA)                                                             | Advanced-stage cancer diagnoses and limited prognoses                                     |

|                         |                                                                                                                                                                                                   |                                                           |                                                                                                                                                                                                                                                 |                                                                                                                                                                                                                 |                                     |                                                                       |                                          |                             |                              |                                                                                                                                                                        |
|-------------------------|---------------------------------------------------------------------------------------------------------------------------------------------------------------------------------------------------|-----------------------------------------------------------|-------------------------------------------------------------------------------------------------------------------------------------------------------------------------------------------------------------------------------------------------|-----------------------------------------------------------------------------------------------------------------------------------------------------------------------------------------------------------------|-------------------------------------|-----------------------------------------------------------------------|------------------------------------------|-----------------------------|------------------------------|------------------------------------------------------------------------------------------------------------------------------------------------------------------------|
|                         | illness, medicines and trial experiences of participants                                                                                                                                          |                                                           |                                                                                                                                                                                                                                                 |                                                                                                                                                                                                                 |                                     |                                                                       |                                          |                             |                              |                                                                                                                                                                        |
| <b>Catt, 2019*, UK</b>  | To explore experiences of treatment decisions, information provision, perceived benefits and harms of treatment and the effects of these on patients' lives                                       | Interviews                                                | Consecutive sampling; across 20 hospitals in England, Scotland, Wales                                                                                                                                                                           | Metastatic castrate-resistant prostate cancer (mCRPC); abirateron, enzalutamide, docetaxel, radium-223, cabazitaxel, steroid switch + abiraterone, goserelin, docetaxel + AZD5363, or enzalutamide + radium-223 | 37                                  | Partnered men (89.2%): 70.8 (56-89); single men (10.8%): 80.5 (71-91) | 0.0                                      | NR                          | Thematic analysis            | Advanced prostate cancer; progressive advanced prostate cancer; treatment has stopped working; the cancer has spread; aggressive prostate cancer; cancer is metastatic |
| Grimsbo, 2011**, Norway | To explore the use and content of patients' e-mail messages sent to oncology nurses and thus gain a "snapshot" of patients' experiences of living with cancer as expressed through these messages | Analysis of 276 messages from patients to oncology nurses | Convenience sampling; recruitment via advertisements in the newspaper, on the Norwegian Cancer Society's Website, and its membership magazine, and through information pamphlets mailed to patients from the Norwegian National Cancer Registry | Breast cancer (63.3%) or prostate cancer (36.7%); currently receiving active treatment, not further specified                                                                                                   | 60 (16.7% patients with metastases) | Breast cancer: 52 (SD=7.9); prostate cancer: 65 (SD=7.6) (35-77)      | Breast cancer: 100; prostate cancer: 0.0 | n=25 >1 year; n=34 ≤ 1 year | Qualitative content analysis | Patients with metastases                                                                                                                                               |

**Table S4.** Data-extraction table of mixed-methods studies.

| Author                                              | Study design                                              | Psychosocial outcomes                                                                         | Recruitment                                                              | Patients                                                                                                                                                                                                                                                                                                        | Sample size                          | Mean age (years)                                                                                                                                              | Female sex (%)                 | Time since diagnosis | Quantitative baseline results (mean (SD))                                     | Terminology patient group                                                                                    |
|-----------------------------------------------------|-----------------------------------------------------------|-----------------------------------------------------------------------------------------------|--------------------------------------------------------------------------|-----------------------------------------------------------------------------------------------------------------------------------------------------------------------------------------------------------------------------------------------------------------------------------------------------------------|--------------------------------------|---------------------------------------------------------------------------------------------------------------------------------------------------------------|--------------------------------|----------------------|-------------------------------------------------------------------------------|--------------------------------------------------------------------------------------------------------------|
| <b>Ito, 2018, UK, France, Germany, Italy, Spain</b> | Cross-sectional mixed-methods: interviews, questionnaires | Quality of Life; Experiences of chemotherapy in combination with androgen deprivation therapy | Recruitment via five European countries                                  | Metastatic hormone-sensitive prostate cancer; chemotherapy (docetaxel) in combination with androgen deprivation therapy                                                                                                                                                                                         | Interviews: 31; questionnaires : 161 | Interviews: 41-50 (n=1), 51-60 (n=11), 61-70 (n=11), 71-80 (n=8); questionnaires: ≤40 (n=6) 41-50 (n=8), 51-60 (n=30), 61-70 (n=64), 71-80 (n=50), ≥ 81 (n=3) | 0.0                            | NR                   | <i>FACT-P</i> 92.4 (21.9) <i>EW</i> 15.0 (5.7) <i>EQ-5D-5LVAS</i> 60.7 (17.3) | Men with metastatic hormone-sensitive prostate cancer; metastatic hormone-sensitive prostate cancer patients |
| <b>Paterson, 2017, Scotland</b>                     | Cross-sectional mixed-methods: interviews, questionnaires | Quality of Life; Experience of unmet supportive care needs                                    | Purposive sampling; recruitment via a main cancer centre in Scotland     | Locally advanced and metastatic prostate cancer; hormonal treatment                                                                                                                                                                                                                                             | Interviews: 8, questionnaires : 31   | 80.1 (SD= 6.9)                                                                                                                                                | 0.0                            | 1-2 years            | <i>EORTC-QLQ-C30</i> GH 69.6 (23.9) EF 88.2 (16.9)                            | Men affected by prostate cancer on hormone therapy                                                           |
| <b>Ihrig, 2020, Germany</b>                         | Cross-sectional mixed-methods: interviews, questionnaires | Possible prejudices, biases, unrealistic expectations and misconceptions about immunotherapy  | Consecutive sampling; recruitment via the university hospital Heidelberg | Advanced cancer: immune checkpoint inhibitors (ICI) (n=53): dermatological tumours (43%), thoracic tumours (38%), gastrointestinal tumours (4%), other tumours (15%), metastasis (96%); chemotherapy (CT) (n=55): thoracic tumours (38%), gastrointestinal tumours (49%), other tumours (13%). metastasis (85%) | 161                                  | 59.5 (S=11.7) versus 62.4 (SD=11.0) for ICI versus CT                                                                                                         | 40.0 for both ICI and CT group | NR                   | No outcomes of validated measures were reported                               | Advanced-stage cancer patients                                                                               |

|                                      |                                                                        |                                                        |                                                                                                                                                                         |                                                                                              |                                      |                                                                                                                                |      |                                                                              |                                                                                                                                                                                                  |                                                                                                            |
|--------------------------------------|------------------------------------------------------------------------|--------------------------------------------------------|-------------------------------------------------------------------------------------------------------------------------------------------------------------------------|----------------------------------------------------------------------------------------------|--------------------------------------|--------------------------------------------------------------------------------------------------------------------------------|------|------------------------------------------------------------------------------|--------------------------------------------------------------------------------------------------------------------------------------------------------------------------------------------------|------------------------------------------------------------------------------------------------------------|
| <b>Komatsu, 2020, Japan</b>          | Longitudinal mixed-methods RCT: focus group interviews, questionnaires | Self-efficacy; Quality of Life; psychological distress | Recruitment via outpatient lists by primary physicians, at the outpatient clinics of three cancer centres and one university hospital in Japan                          | Metastatic breast cancer; chemotherapy or targeted therapy                                   | 155                                  | 57.0 (SD=12.2) versus 59.4 (SD=11.6) for the nurse-led medication self-management programme (n=78) versus control group (n=76) | 100  | NR                                                                           | GSE 26.7 (0.6) versus 25.7(0.8) FACT-B 90.3 (2.4) versus 92.6 (2.1) 6-item Kessler 6 (K6) 5.0 (0.5) versus 5.3 (0.5) for the nurse-led medication self-management programme versus control group | Patients with metastatic breast cancer (undergoing oral anticancer treatment)                              |
| <b>Mieras, 2020, The Netherlands</b> | Cross-sectional mixed-methods: interviews, questionnaires              | Quality of Life                                        | Purposive sampling for the interviews; recruitment via clinic schedules by treating oncologists via one academic and five non-academic hospitals across the Netherlands | Metastatic lung cancer; chemotherapy (36%), immunotherapy (47%), TKIs (17%)                  | 266                                  | 65.0 (SD=9.0)                                                                                                                  | 45.0 | NR                                                                           | EORTC-QLQ-C30 baseline means NR                                                                                                                                                                  | Patients with metastasized lung cancer; patients diagnosed with metastatic lung cancer                     |
| <b>Charalambo us, 2016, Cyprus</b>   | Cross-sectional mixed-methods: interviews, questionnaires              | Quality of Life                                        | Recruitment via the Out-Patients Oncology Clinics of two public hospitals in Cyprus; randomly selected patients (from the quantitative                                  | Advanced prostate cancer; chemotherapy with docetaxel as primary or combination chemotherapy | Interviews: 15; questionnaires : 148 | 40–50 (16.9%); 51–60 (25.0%); 61–70 (31.8%); >70 (26.4%)                                                                       | 0.0  | 6 months-3 years: 59.5%; 4-6 years: 30.4%; 7-10 years: 4.1%; >10 years: 6.1% | EORTC-QLQ-C30 GH 56.7 (19.0) EF 48.25 (26.55)                                                                                                                                                    | Patients diagnosed with advanced prostate cancer (during the period of active treatment with chemotherapy) |

|  |  |  |                                                                                                              |  |  |  |  |  |  |  |
|--|--|--|--------------------------------------------------------------------------------------------------------------|--|--|--|--|--|--|--|
|  |  |  | sample) were interviewed on the basis of the findings from the statistical analysis of the quantitative data |  |  |  |  |  |  |  |
|--|--|--|--------------------------------------------------------------------------------------------------------------|--|--|--|--|--|--|--|
