# Supplementary figures and images for: Psychosocial Aspects of Living Long Term with Advanced Cancer and Ongoing Systemic Treatment: A Scoping Review
Source: MDPI journal article supplement (doi:10.3390/cancers14163889), 2022-08-11

**Figure S1.** PRISMA-ScR Flow chart.

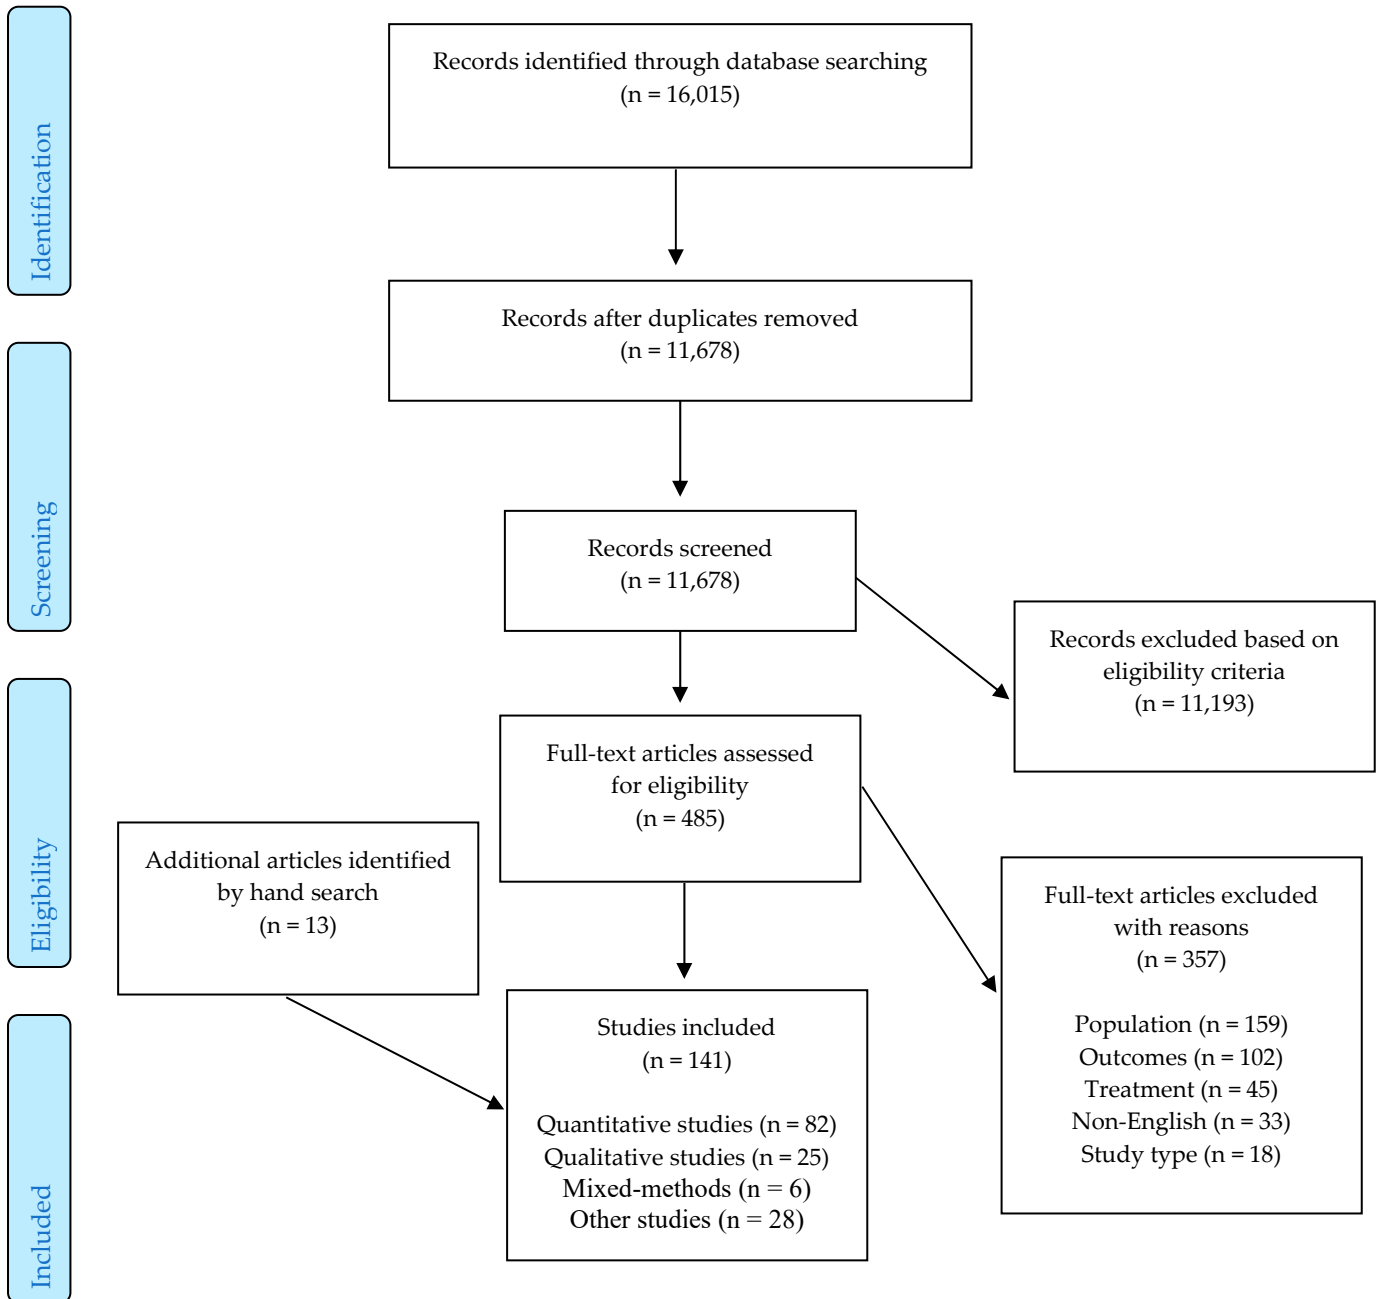

Supplement: s1 [file s1]
